# Supplementary material for: Potential marker genes for chronic obstructive pulmonary disease revealed based on single-cell sequencing and Mendelian randomization analysis
Source: Aging (Albany NY). 2024 May 23;16(10):8922–43. doi: 10.18632/aging.205849 (PMC11164476; doi:10.18632/aging.205849)
Supplement: Supplementary Table 1 [file aging-16-205849-s002.xls]

## Sheet: Sheet1
Supplementary Table 1. 411 cellular subtype marker genes extracted from single-cell expression profiles.
p_val	avg_log2FC	pct.1	pct.2	p_val_adj	cluster	gene
0	3.37625	0.575	0.114	0	NK_cell	GNLY
0	3.19319	0.655	0.095	0	NK_cell	NKG7
0	2.78465	0.659	0.162	0	NK_cell	CCL4
0	2.69559	0.799	0.121	0	NK_cell	CCL5
0	2.64722	0.589	0.07	0	NK_cell	GZMB
0	2.20303	0.675	0.076	0	NK_cell	CST7
0	2.13308	0.589	0.061	0	NK_cell	CTSW
0	2.05977	0.461	0.03	0	NK_cell	FGFBP2
0	2.00858	0.509	0.03	0	NK_cell	GZMH
0	1.86185	0.513	0.027	0	NK_cell	PRF1
0	1.81891	0.692	0.139	0	NK_cell	CD7
0	1.71113	0.522	0.143	0	NK_cell	CMC1
0	1.68028	0.487	0.024	0	NK_cell	KLRD1
0	1.67981	0.559	0.051	0	NK_cell	GZMA
0	1.36763	0.638	0.163	0	NK_cell	IL32
0	1.35418	0.803	0.341	0	NK_cell	DUSP2
0	1.30456	0.695	0.305	0	NK_cell	ID2
0	1.26801	0.691	0.263	0	NK_cell	HCST
0	1.18731	0.981	0.721	0	NK_cell	HLA-A
0	1.18236	0.472	0.062	0	NK_cell	CD247
0	1.15181	0.604	0.144	0	NK_cell	TRBC1
0	1.13215	0.795	0.387	0	NK_cell	DDIT4
0	1.10282	0.528	0.142	0	NK_cell	SYTL3
0	1.09687	0.541	0.219	0	NK_cell	CD69
0	1.0842	0.984	0.719	0	NK_cell	HLA-C
0	1.0716	0.915	0.54	0	NK_cell	ZFP36L2
0	1.05588	0.759	0.408	0	NK_cell	CREM
0	-1.46147	0.987	0.948	0	NK_cell	FTH1
0	-2.99153	0.258	0.567	0	NK_cell	HLA-DRA
5.33404e-226	-2.61421	0.966	0.925	1.79725e-221	NK_cell	FTL
3.37684e-171	-1.72975	0.598	0.646	1.13779e-166	NK_cell	SAT1
1.49717e-140	-2.15603	0.646	0.65	5.04456e-136	NK_cell	CD74
9.21286e-117	-1.79094	0.361	0.484	3.10418e-112	NK_cell	HLA-DRB1
3.64918e-80	-3.7141	0.478	0.624	1.22955e-75	NK_cell	SCGB1A1
9.56831e-75	-1.61876	0.512	0.518	3.22395e-70	NK_cell	S100A11
1.35412e-51	-3.5474	0.462	0.574	4.56256e-47	NK_cell	SCGB3A1
7.44392e-44	-1.19324	0.406	0.463	2.50816e-39	NK_cell	CSTB
1.43159e-12	-1.02227	0.852	0.667	4.82359e-08	NK_cell	S100A6
4.59855e-12	-1.22931	0.504	0.471	1.54944e-07	NK_cell	GSTP1
3.40413e-07	-1.29363	0.478	0.431	0.0114699	NK_cell	HLA-DPB1
0	1.37159	0.677	0.192	0	T_cells	IL7R
0	1.25104	0.662	0.194	0	T_cells	TRAC
0	1.24746	0.494	0.114	0	T_cells	CCR7
0	1.22944	0.695	0.2	0	T_cells	CD3D
0	1.09647	0.857	0.627	0	T_cells	SARAF
0	1.08359	0.999	0.915	0	T_cells	MALAT1
1.09057e-304	1.09409	0.918	0.709	3.67455e-300	T_cells	JUNB
6.3504e-249	1.02709	0.641	0.332	2.13971e-244	T_cells	LEPROTL1
1.30618e-232	-1.7282	0.12	0.511	4.40105e-228	T_cells	CD63
8.01469e-213	-1.83125	0.585	0.754	2.70047e-208	T_cells	S100A6
1.45142e-201	-2.02387	0.142	0.499	4.89041e-197	T_cells	HLA-DPB1
2.46154e-199	-2.59101	0.921	0.942	8.29391e-195	T_cells	FTL
1.50786e-198	-2.45793	0.442	0.684	5.08058e-194	T_cells	CD74
1.13537e-191	-1.8876	0.198	0.531	3.82551e-187	T_cells	GSTP1
2.27783e-186	-1.91953	0.127	0.473	7.67492e-182	T_cells	HLA-DPA1
1.6152e-181	-2.74168	0.196	0.509	5.44224e-177	T_cells	HLA-DRA
5.61089e-179	-1.97928	0.157	0.492	1.89053e-174	T_cells	HLA-DRB1
3.0523e-145	-1.80681	0.288	0.555	1.02844e-140	T_cells	S100A11
5.60621e-131	-1.07932	0.521	0.694	1.88896e-126	T_cells	CYBA
6.13925e-119	-1.00969	0.642	0.758	2.06856e-114	T_cells	MYL6
6.47181e-119	-2.22173	0.235	0.494	2.18061e-114	T_cells	MT2A
5.24201e-97	-1.00058	0.605	0.724	1.76624e-92	T_cells	PFN1
2.29041e-82	-1.42808	0.528	0.647	7.71731e-78	T_cells	SAT1
3.6436e-73	-1.08845	0.955	0.962	1.22768e-68	T_cells	FTH1
6.92808e-72	-1.00905	0.489	0.637	2.33435e-67	T_cells	S100A4
3.06e-59	-1.14116	0.3	0.469	1.03104e-54	T_cells	CSTB
2.82317e-10	-2.81691	0.654	0.561	9.51238e-06	T_cells	SCGB1A1
0	3.9923	0.568	0.145	0	Macrophage	APOC1
0	3.71493	0.511	0.132	0	Macrophage	APOE
0	3.57763	0.984	0.932	0	Macrophage	FTL
0	3.3531	0.521	0.085	0	Macrophage	C1QA
0	3.31	0.5	0.054	0	Macrophage	C1QB
0	2.05561	0.466	0.089	0	Macrophage	CD68
0	1.95566	0.976	0.959	0	Macrophage	FTH1
0	1.82066	0.544	0.174	0	Macrophage	LYZ
0	1.48491	0.506	0.127	0	Macrophage	AIF1
0	-1.96648	0.861	0.937	0	Macrophage	MALAT1
1.22132e-284	-1.46907	0.495	0.817	4.1151e-280	Macrophage	BTG1
1.2018e-281	2.11527	0.699	0.427	4.04935e-277	Macrophage	HLA-DRA
5.78953e-280	-1.77574	0.363	0.712	1.95072e-275	Macrophage	ZFP36L2
1.52928e-276	1.83864	0.633	0.341	5.15276e-272	Macrophage	TYROBP
1.63052e-273	1.78822	0.456	0.144	5.49386e-269	Macrophage	FABP5
6.34158e-243	-1.41704	0.467	0.782	2.13673e-238	Macrophage	JUNB
4.97141e-239	-1.53344	0.365	0.704	1.67507e-234	Macrophage	CXCR4
2.35231e-237	1.953	0.572	0.305	7.92588e-233	Macrophage	GPX1
2.45882e-237	1.75407	0.576	0.268	8.28474e-233	Macrophage	CST3
6.47617e-236	-1.18632	0.417	0.737	2.18208e-231	Macrophage	ZFP36
1.02163e-229	1.64996	0.531	0.222	3.44226e-225	Macrophage	FCER1G
1.00578e-217	1.41195	0.46	0.173	3.38888e-213	Macrophage	HLA-DMA
3.50814e-211	1.65548	0.494	0.212	1.18203e-206	Macrophage	HLA-DQB1
1.56138e-192	1.82501	0.512	0.25	5.2609e-188	Macrophage	LGALS3
1.08352e-191	1.95025	0.609	0.394	3.6508e-187	Macrophage	HLA-DPA1
7.18276e-177	2.29424	0.507	0.301	2.42016e-172	Macrophage	CTSD
6.78261e-173	1.61911	0.637	0.498	2.28533e-168	Macrophage	S100A11
2.61142e-169	1.46573	0.454	0.187	8.79892e-165	Macrophage	HLA-DQA1
1.79237e-167	2.03351	0.577	0.424	6.03922e-163	Macrophage	CSTB
4.15493e-156	1.56394	0.704	0.64	1.39996e-151	Macrophage	CD74
5.1231e-156	1.7814	0.601	0.423	1.72618e-151	Macrophage	HLA-DPB1
4.73427e-140	1.51074	0.456	0.23	1.59517e-135	Macrophage	HLA-DRB5
6.54538e-128	1.86603	0.572	0.423	2.2054e-123	Macrophage	HLA-DRB1
1.98317e-114	1.25032	0.5	0.301	6.68209e-110	Macrophage	NPC2
8.31796e-101	1.2446	0.453	0.271	2.80265e-96	Macrophage	NOP10
7.76898e-98	1.29895	0.473	0.32	2.61768e-93	Macrophage	ATP6V1F
4.68566e-94	1.25158	0.461	0.291	1.57879e-89	Macrophage	GLUL
2.01603e-93	1.48625	0.477	0.337	6.79281e-89	Macrophage	PSAP
4.54057e-75	1.29795	0.592	0.582	1.5299e-70	Macrophage	VIM
1.86254e-67	1.44077	0.521	0.444	6.27565e-63	Macrophage	CD63
3.4249e-65	1.29525	0.494	0.408	1.15399e-60	Macrophage	TSPO
2.67358e-57	1.0199	0.486	0.354	9.00835e-53	Macrophage	TXN
1.26064e-44	1.04696	0.581	0.674	4.24762e-40	Macrophage	YBX1
3.72272e-44	1.11914	0.53	0.504	1.25433e-39	Macrophage	S100A10
7.01937e-29	1.14561	0.514	0.467	2.36511e-24	Macrophage	TUBA1B
0	5.11526	0.713	0.101	0	Monocyte	S100A8
0	4.72209	0.82	0.133	0	Monocyte	S100A9
0	3.16773	0.629	0.051	0	Monocyte	G0S2
0	2.96692	0.869	0.16	0	Monocyte	LYZ
0	2.92665	0.889	0.109	0	Monocyte	LST1
0	2.90915	0.793	0.207	0	Monocyte	TIMP1
0	2.69801	0.712	0.019	0	Monocyte	FCN1
0	2.61328	0.81	0.122	0	Monocyte	PLAUR
0	2.50115	0.849	0.179	0	Monocyte	NAMPT
0	2.49945	0.833	0.113	0	Monocyte	AIF1
0	2.31371	0.941	0.599	0	Monocyte	SAT1
0	2.2665	0.511	0.062	0	Monocyte	THBS1
0	2.15488	0.863	0.255	0	Monocyte	CST3
0	2.07842	0.848	0.206	0	Monocyte	FCER1G
0	2.06162	0.518	0.019	0	Monocyte	VCAN
0	1.97168	0.759	0.198	0	Monocyte	SOD2
0	1.96581	0.833	0.279	0	Monocyte	COTL1
0	1.87003	0.943	0.325	0	Monocyte	TYROBP
0	1.84907	0.459	0.061	0	Monocyte	RP11-1143G9.4
0	1.80978	0.647	0.066	0	Monocyte	C5AR1
0	1.7857	0.828	0.273	0	Monocyte	CTSS
0	1.75584	0.787	0.196	0	Monocyte	TYMP
0	1.74408	0.866	0.511	0	Monocyte	NEAT1
0	1.68191	0.502	0.055	0	Monocyte	MNDA
0	1.63534	0.573	0.04	0	Monocyte	FPR1
0	1.59261	0.638	0.071	0	Monocyte	CSTA
0	1.55101	0.53	0.055	0	Monocyte	CD14
0	1.49589	0.823	0.31	0	Monocyte	PSAP
0	1.46215	0.999	0.957	0	Monocyte	FTH1
0	1.44283	0.949	0.692	0	Monocyte	H3F3A
0	1.43978	0.591	0.063	0	Monocyte	SLC11A1
0	1.38249	0.551	0.108	0	Monocyte	BCL2A1
0	1.37753	0.514	0.05	0	Monocyte	MS4A6A
0	1.37631	0.493	0.068	0	Monocyte	LINC01272
0	1.35384	0.653	0.09	0	Monocyte	SERPINA1
0	1.34247	0.518	0.064	0	Monocyte	THBD
0	1.33585	0.631	0.101	0	Monocyte	AP1S2
0	1.31368	0.546	0.019	0	Monocyte	CFP
0	1.30001	0.68	0.138	0	Monocyte	C1orf162
0	1.28851	0.561	0.063	0	Monocyte	IFI30
0	1.27628	0.58	0.036	0	Monocyte	FGL2
0	1.2761	0.62	0.076	0	Monocyte	SPI1
0	1.26451	0.826	0.327	0	Monocyte	LGALS1
0	1.25172	0.583	0.138	0	Monocyte	STXBP2
0	1.21128	0.63	0.166	0	Monocyte	CEBPD
0	1.2107	0.469	0.05	0	Monocyte	MXD1
0	1.18492	0.554	0.081	0	Monocyte	HBEGF
0	1.17111	0.506	0.089	0	Monocyte	BASP1
0	1.15248	0.611	0.17	0	Monocyte	TKT
0	1.14318	0.577	0.083	0	Monocyte	CFD
0	1.1201	0.48	0.084	0	Monocyte	IER3
0	1.06644	0.558	0.111	0	Monocyte	PTPRE
0	1.02302	0.518	0.084	0	Monocyte	RAB31
2.15768e-306	1.22768	0.967	0.834	7.27008e-302	Monocyte	ACTB
2.7338e-304	1.52743	0.757	0.277	9.21125e-300	Monocyte	RGS2
9.5059e-302	1.35701	0.777	0.34	3.20292e-297	Monocyte	ATP1B3
3.54304e-296	1.47435	0.793	0.344	1.19379e-291	Monocyte	EMP3
6.13281e-295	1.55076	0.914	0.586	2.06639e-290	Monocyte	S100A4
8.257e-295	1.12993	0.679	0.231	2.78211e-290	Monocyte	RILPL2
5.44039e-286	1.35808	0.771	0.344	1.83309e-281	Monocyte	CEBPB
3.06547e-277	1.25106	0.928	0.476	1.03288e-272	Monocyte	S100A11
3.17007e-254	1.30083	0.759	0.323	1.06812e-249	Monocyte	SAMSN1
2.95562e-250	1.28511	0.968	0.706	9.95868e-246	Monocyte	S100A6
4.5033e-241	1.16528	0.944	0.698	1.51734e-236	Monocyte	SRGN
1.12065e-234	1.10563	0.63	0.224	3.77593e-230	Monocyte	HLA-DRB5
4.35848e-228	1.0069	0.644	0.254	1.46855e-223	Monocyte	RNASET2
2.8388e-219	1.06794	0.791	0.383	9.56504e-215	Monocyte	TSPO
3.16152e-216	1.10477	0.604	0.224	1.06524e-211	Monocyte	SERPINB1
3.25228e-215	1.30183	0.839	0.427	1.09582e-210	Monocyte	HLA-DRA
2.55813e-185	1.32894	0.766	0.411	8.61936e-181	Monocyte	HLA-DRB1
5.74127e-181	1.03249	0.807	0.437	1.93446e-176	Monocyte	MCL1
4.45415e-163	1.76619	0.761	0.424	1.50078e-158	Monocyte	IFITM2
9.94289e-159	-1.02248	0.879	0.89	3.35016e-154	Monocyte	RPL3
6.71571e-136	1.28718	0.694	0.396	2.26279e-131	Monocyte	HLA-DPA1
2.51264e-130	-1.81945	0.468	0.685	8.46607e-126	Monocyte	ZFP36L2
6.4505e-126	1.39993	0.698	0.423	2.17343e-121	Monocyte	HLA-DPB1
6.8441e-119	1.48626	0.675	0.413	2.30605e-114	Monocyte	AREG
1.19767e-114	1.08997	0.843	0.63	4.03544e-110	Monocyte	CD74
4.80876e-77	-1.00262	0.968	0.923	1.62026e-72	Monocyte	MALAT1
1.32861e-67	-1.05416	0.593	0.667	4.47663e-63	Monocyte	CALM1
8.33023e-48	-1.10068	0.598	0.66	2.80679e-43	Monocyte	TSC22D3
1.77715e-40	-1.06309	0.372	0.522	5.98795e-36	Monocyte	RGCC
1.20639e-30	-1.0531	0.679	0.657	4.06481e-26	Monocyte	CXCR4
1.81613e-11	-3.21856	0.561	0.576	6.11928e-07	Monocyte	SCGB1A1
0	5.1219	0.493	0.054	0	B_cell	IGKC
0	2.1161	0.493	0.008	0	B_cell	CD79A
1.32664e-304	-1.79704	0.349	0.781	4.46999e-300	B_cell	S100A6
1.042e-242	-1.47336	0.074	0.547	3.51091e-238	B_cell	ANXA1
3.29381e-213	-1.81495	0.152	0.566	1.10982e-208	B_cell	S100A11
3.1938e-212	-1.37204	0.059	0.487	1.07612e-207	B_cell	ID2
1.81062e-203	1.16369	0.711	0.43	6.10069e-199	B_cell	HLA-DRA
1.18099e-200	-2.34122	0.094	0.506	3.97924e-196	B_cell	MT2A
5.48636e-181	-1.34581	0.303	0.658	1.84857e-176	B_cell	S100A4
4.15119e-172	1.51672	0.723	0.639	1.3987e-167	B_cell	CD74
1.72933e-165	-1.01662	0.618	0.834	5.8268e-161	B_cell	HLA-C
2.4373e-152	-1.10898	0.509	0.749	8.21225e-148	B_cell	SRGN
7.93237e-152	1.15174	0.514	0.236	2.67273e-147	B_cell	LTB
3.11333e-149	-1.01214	0.205	0.548	1.049e-144	B_cell	S100A10
4.70866e-149	-1.10678	0.12	0.46	1.58653e-144	B_cell	TSPO
3.58301e-146	-1.21777	0.167	0.493	1.20726e-141	B_cell	CD63
6.66031e-142	-1.32188	0.269	0.58	2.24413e-137	B_cell	NEAT1
8.11486e-99	-1.2489	0.889	0.971	2.73422e-94	B_cell	FTH1
6.92499e-88	1.07477	0.544	0.414	2.33331e-83	B_cell	CD37
2.32759e-08	-1.54676	0.894	0.945	0.000784258	B_cell	FTL
0	4.35959	0.808	0.177	0	Epithelial_cells	SLPI
0	3.81432	0.681	0.068	0	Epithelial_cells	CAPS
0	3.50458	0.637	0.065	0	Epithelial_cells	TPPP3
0	3.2333	0.684	0.048	0	Epithelial_cells	WFDC2
0	3.11675	0.566	0.04	0	Epithelial_cells	C20orf85
0	3.09451	0.556	0.049	0	Epithelial_cells	C9orf24
0	3.08718	0.63	0.033	0	Epithelial_cells	GSTA1
0	2.9711	0.646	0.032	0	Epithelial_cells	TSPAN1
0	2.84028	0.794	0.33	0	Epithelial_cells	PRDX5
0	2.79717	0.555	0.029	0	Epithelial_cells	RSPH1
0	2.78351	0.603	0.032	0	Epithelial_cells	AGR3
0	2.73392	0.522	0.028	0	Epithelial_cells	C1orf194
0	2.65812	0.572	0.039	0	Epithelial_cells	TFF3
0	2.62345	0.661	0.025	0	Epithelial_cells	KRT19
0	2.60524	0.861	0.429	0	Epithelial_cells	GSTP1
0	2.5998	0.568	0.081	0	Epithelial_cells	CETN2
0	2.51299	0.694	0.036	0	Epithelial_cells	FXYD3
0	2.47066	0.499	0.022	0	Epithelial_cells	FAM183A
0	2.42041	0.504	0.02	0	Epithelial_cells	PIFO
0	2.41527	0.586	0.016	0	Epithelial_cells	CYP4B1
0	2.39152	0.665	0.303	0	Epithelial_cells	TUBB4B
0	2.37943	0.526	0.044	0	Epithelial_cells	MORN2
0	2.34306	0.6	0.024	0	Epithelial_cells	AGR2
0	2.3415	0.657	0.025	0	Epithelial_cells	KRT8
0	2.33704	0.473	0.025	0	Epithelial_cells	OMG
0	2.30639	0.767	0.445	0	Epithelial_cells	DYNLL1
0	2.30461	0.638	0.068	0	Epithelial_cells	ALDH1A1
0	2.28447	0.606	0.026	0	Epithelial_cells	ELF3
0	2.27912	0.608	0.032	0	Epithelial_cells	TACSTD2
0	2.21565	0.48	0.016	0	Epithelial_cells	C11orf88
0	2.2101	0.646	0.03	0	Epithelial_cells	KRT18
0	2.20299	0.475	0.015	0	Epithelial_cells	CAPSL
0	2.17415	0.551	0.044	0	Epithelial_cells	CD24
0	2.14098	0.677	0.128	0	Epithelial_cells	CYB5A
0	2.124	0.481	0.018	0	Epithelial_cells	C9orf116
0	2.05385	0.478	0.019	0	Epithelial_cells	C5orf49
0	2.04032	0.584	0.025	0	Epithelial_cells	CLDN4
0	2.01411	0.67	0.147	0	Epithelial_cells	CD59
0	2.01028	0.538	0.014	0	Epithelial_cells	CXCL17
0	1.98366	0.461	0.013	0	Epithelial_cells	SNTN
0	1.96224	0.465	0.016	0	Epithelial_cells	DYNLRB2
0	1.92612	0.481	0.018	0	Epithelial_cells	MS4A8
0	1.9151	0.507	0.07	0	Epithelial_cells	ODF3B
0	1.8979	0.58	0.14	0	Epithelial_cells	NUCB2
0	1.8782	0.457	0.027	0	Epithelial_cells	GDF15
0	1.85026	0.505	0.068	0	Epithelial_cells	CES1
0	1.84705	0.6	0.056	0	Epithelial_cells	PERP
0	1.8427	0.509	0.017	0	Epithelial_cells	PIGR
0	1.84009	0.644	0.235	0	Epithelial_cells	HMGN3
0	1.81623	0.511	0.013	0	Epithelial_cells	SMIM22
0	1.79788	0.548	0.151	0	Epithelial_cells	PSENEN
0	1.77115	0.745	0.311	0	Epithelial_cells	ANXA2
0	1.73862	0.457	0.028	0	Epithelial_cells	EMP2
0	1.72708	0.522	0.028	0	Epithelial_cells	CKB
0	1.6679	0.474	0.038	0	Epithelial_cells	IGFBP2
0	1.64779	0.652	0.125	0	Epithelial_cells	CD9
0	1.6265	0.526	0.098	0	Epithelial_cells	IFT57
0	1.61848	0.49	0.008	0	Epithelial_cells	CLDN3
0	1.61269	0.697	0.276	0	Epithelial_cells	DSTN
0	1.58437	0.585	0.121	0	Epithelial_cells	CYSTM1
0	1.52712	0.589	0.064	0	Epithelial_cells	CLU
0	1.52148	0.613	0.12	0	Epithelial_cells	SPINT2
0	1.49988	0.561	0.18	0	Epithelial_cells	NUDC
0	1.48398	0.469	0.061	0	Epithelial_cells	HES1
0	1.4811	0.606	0.19	0	Epithelial_cells	HSBP1
0	1.47814	0.626	0.23	0	Epithelial_cells	TSTD1
0	1.46591	0.506	0.011	0	Epithelial_cells	CRNDE
0	1.45738	0.479	0.01	0	Epithelial_cells	SLC44A4
0	1.40677	0.508	0.121	0	Epithelial_cells	POLR2I
0	1.3411	0.457	0.035	0	Epithelial_cells	AK1
0	1.33963	0.504	0.102	0	Epithelial_cells	DNPH1
0	1.32281	0.505	0.033	0	Epithelial_cells	EPHX1
0	1.31055	0.473	0.08	0	Epithelial_cells	ID1
0	1.27719	0.551	0.155	0	Epithelial_cells	IGFBP7
0	1.27553	0.489	0.008	0	Epithelial_cells	PLPP2
0	1.2415	0.493	0.055	0	Epithelial_cells	MGST1
0	1.23669	0.462	0.083	0	Epithelial_cells	C21orf59
0	1.19827	0.556	0.116	0	Epithelial_cells	GSN
0	1.17918	0.659	0.232	0	Epithelial_cells	LGALS3
0	1.17829	0.516	0.152	0	Epithelial_cells	H2AFJ
0	1.17371	0.483	0.006	0	Epithelial_cells	EPCAM
0	1.15332	0.459	0.013	0	Epithelial_cells	DMKN
0	1.09457	0.505	0.068	0	Epithelial_cells	TSC22D1
0	1.08074	0.473	0.029	0	Epithelial_cells	CLDN7
0	1.02742	0.459	0.072	0	Epithelial_cells	TSPAN3
0	-1.12393	0.939	0.97	0	Epithelial_cells	B2M
0	-1.13525	0.846	0.926	0	Epithelial_cells	RPL21
0	-1.13646	0.861	0.934	0	Epithelial_cells	RPL10
0	-1.16854	0.842	0.923	0	Epithelial_cells	RPS2
0	-1.24893	0.762	0.888	0	Epithelial_cells	RPS15A
0	-1.28405	0.794	0.915	0	Epithelial_cells	RPS19
0	-1.31433	0.794	0.907	0	Epithelial_cells	RPLP2
0	-1.33518	0.758	0.888	0	Epithelial_cells	RPS3
0	-1.40615	0.712	0.864	0	Epithelial_cells	HLA-B
0	-1.45042	0.833	0.922	0	Epithelial_cells	RPS27
0	-1.45147	0.71	0.864	0	Epithelial_cells	RPS29
0	-1.63878	0.715	0.876	0	Epithelial_cells	TMSB10
0	-1.7451	0.65	0.831	0	Epithelial_cells	HLA-A
0	-1.94988	0.827	0.982	0	Epithelial_cells	TMSB4X
0	-1.97108	0.191	0.679	0	Epithelial_cells	ARHGDIB
0	-2.35313	0.526	0.809	0	Epithelial_cells	BTG1
0	-2.87995	0.23	0.789	0	Epithelial_cells	SRGN
0	-2.88707	0.189	0.725	0	Epithelial_cells	CXCR4
2.84232e-307	-1.24664	0.736	0.885	9.57691e-303	Epithelial_cells	RPS23
8.87056e-302	-1.22394	0.754	0.882	2.98884e-297	Epithelial_cells	RPL30
1.85653e-299	-1.14411	0.797	0.901	6.25541e-295	Epithelial_cells	RPL32
1.51393e-297	-1.1693	0.832	0.926	5.10102e-293	Epithelial_cells	RPS18
5.42718e-295	-1.71355	0.089	0.569	1.82863e-290	Epithelial_cells	LAPTM5
2.06155e-294	-1.35188	0.817	0.942	6.94619e-290	Epithelial_cells	MALAT1
2.09815e-292	-2.13195	0.166	0.607	7.06951e-288	Epithelial_cells	CD52
1.27256e-290	-1.07378	0.83	0.91	4.28775e-286	Epithelial_cells	RPS27A
1.06742e-287	-1.07514	0.762	0.882	3.59656e-283	Epithelial_cells	RPL26
1.54088e-279	-1.14354	0.777	0.905	5.19186e-275	Epithelial_cells	RPS12
1.84873e-279	-1.10605	0.786	0.892	6.22912e-275	Epithelial_cells	RPL23A
5.05664e-277	-1.57118	0.044	0.515	1.70379e-272	Epithelial_cells	PTPRC
5.30603e-272	1.16677	0.601	0.229	1.78781e-267	Epithelial_cells	SEPW1
1.86402e-271	1.20627	0.575	0.201	6.28064e-267	Epithelial_cells	HSPB1
1.77567e-270	-1.96092	0.356	0.696	5.98294e-266	Epithelial_cells	TSC22D3
3.3878e-269	1.384	0.672	0.306	1.14149e-264	Epithelial_cells	PRDX1
5.67266e-268	1.1424	0.471	0.14	1.91135e-263	Epithelial_cells	HSPB11
2.39176e-263	2.24794	0.789	0.568	8.05878e-259	Epithelial_cells	HSP90AA1
6.36244e-262	1.34132	0.596	0.242	2.14376e-257	Epithelial_cells	SRI
2.21947e-259	-1.1354	0.73	0.864	7.47829e-255	Epithelial_cells	RPL39
3.89227e-257	-1.59049	0.073	0.518	1.31146e-252	Epithelial_cells	CORO1A
4.35388e-256	-2.40993	0.344	0.653	1.46699e-251	Epithelial_cells	S100A4
2.37628e-254	1.41071	0.508	0.177	8.00664e-250	Epithelial_cells	IK
7.13484e-246	-1.46148	0.049	0.483	2.40401e-241	Epithelial_cells	CD37
1.06766e-243	-1.36207	0.095	0.518	3.59737e-239	Epithelial_cells	FXYD5
2.38663e-243	1.67136	0.662	0.341	8.0415e-239	Epithelial_cells	ATPIF1
4.25698e-243	1.01002	0.529	0.183	1.43435e-238	Epithelial_cells	YWHAE
4.58271e-240	-1.44256	0.055	0.481	1.5441e-235	Epithelial_cells	GMFG
7.79868e-238	-2.01788	0.427	0.699	2.62769e-233	Epithelial_cells	ZFP36L2
5.6316e-235	1.49406	0.622	0.288	1.89751e-230	Epithelial_cells	DYNLT1
9.36461e-232	1.59732	0.605	0.286	3.15531e-227	Epithelial_cells	UFC1
7.86731e-230	-1.09876	0.686	0.832	2.65081e-225	Epithelial_cells	RPL37
1.57131e-229	-1.47666	0.498	0.713	5.29436e-225	Epithelial_cells	HLA-E
2.44081e-229	-1.31805	0.682	0.826	8.22407e-225	Epithelial_cells	HLA-C
6.56601e-226	-1.86178	0.159	0.544	2.21235e-221	Epithelial_cells	DUSP2
2.82977e-220	-1.82641	0.3	0.623	9.53464e-216	Epithelial_cells	VIM
5.39056e-217	-1.56053	0.059	0.455	1.8163e-212	Epithelial_cells	HCST
4.41659e-214	1.1062	0.787	0.478	1.48813e-209	Epithelial_cells	S100A11
5.76874e-209	-1.58749	0.454	0.671	1.94372e-204	Epithelial_cells	SH3BGRL3
5.47643e-206	1.1151	0.853	0.712	1.84523e-201	Epithelial_cells	S100A6
8.26359e-201	1.33162	0.672	0.395	2.78433e-196	Epithelial_cells	TMEM59
3.01855e-198	1.86716	0.575	0.28	1.01707e-193	Epithelial_cells	TUBA1A
2.49657e-191	-1.0905	0.592	0.761	8.41194e-187	Epithelial_cells	EEF1D
2.20875e-188	-1.74676	0.264	0.563	7.44217e-184	Epithelial_cells	CREM
3.78312e-186	1.17989	0.688	0.399	1.27469e-181	Epithelial_cells	GPX4
7.34514e-183	1.21397	0.454	0.172	2.47487e-178	Epithelial_cells	C12orf75
1.00068e-177	-1.32419	0.586	0.724	3.3717e-173	Epithelial_cells	PFN1
3.27517e-167	-1.10306	0.578	0.719	1.10353e-162	Epithelial_cells	CFL1
8.17351e-166	1.40449	0.636	0.387	2.75398e-161	Epithelial_cells	CIB1
2.90451e-164	-1.3501	0.54	0.687	9.78645e-160	Epithelial_cells	CYBA
6.07895e-163	-1.0671	0.594	0.754	2.04824e-158	Epithelial_cells	RPS21
1.05206e-150	1.10549	0.658	0.406	3.5448e-146	Epithelial_cells	TMBIM6
1.25058e-150	1.24514	0.771	0.627	4.21371e-146	Epithelial_cells	CALM2
4.7129e-140	-1.12763	0.483	0.629	1.58796e-135	Epithelial_cells	ARPC2
1.6312e-138	4.29734	0.742	0.507	5.49616e-134	Epithelial_cells	SCGB3A1
1.53691e-133	1.04361	0.654	0.422	5.17847e-129	Epithelial_cells	SOD1
4.70219e-131	1.08281	0.613	0.345	1.58436e-126	Epithelial_cells	JUN
3.89893e-130	-1.51063	0.225	0.486	1.31371e-125	Epithelial_cells	IFITM2
1.14922e-126	4.4031	0.775	0.547	3.87218e-122	Epithelial_cells	SCGB1A1
1.00697e-119	-1.23837	0.335	0.551	3.39289e-115	Epithelial_cells	DDIT4
4.58163e-118	1.12671	0.676	0.459	1.54373e-113	Epithelial_cells	HSP90AB1
1.16296e-112	-1.11366	0.46	0.625	3.91849e-108	Epithelial_cells	RPL36A
3.52316e-94	-1.13495	0.302	0.475	1.18709e-89	Epithelial_cells	ISG20
2.62678e-79	-1.6942	0.312	0.466	8.85066e-75	Epithelial_cells	HLA-DPB1
8.54019e-79	-1.70186	0.287	0.457	2.87753e-74	Epithelial_cells	AREG
5.90506e-54	-1.70112	0.874	0.948	1.98965e-49	Epithelial_cells	FTL
2.45272e-113	-2.0409	0.084	0.68	8.26418e-109	Tissue_stem_cells	CXCR4
2.06309e-107	-1.41331	0.11	0.689	6.95137e-103	Tissue_stem_cells	CYBA
2.20784e-98	-1.46267	0.697	0.936	7.4391e-94	Tissue_stem_cells	MALAT1
3.44774e-98	-1.48626	0.236	0.794	1.16168e-93	Tissue_stem_cells	BTG1
3.46556e-93	-1.56468	0.14	0.686	1.16769e-88	Tissue_stem_cells	ZFP36L2
1.45244e-90	-1.66541	0.056	0.571	4.89386e-86	Tissue_stem_cells	CD52
9.34095e-90	3.24732	0.683	0.448	3.14734e-85	Tissue_stem_cells	MT2A
1.94719e-82	-1.25403	0.044	0.527	6.56087e-78	Tissue_stem_cells	LAPTM5
9.63235e-82	-1.37534	0.06	0.544	3.24552e-77	Tissue_stem_cells	CREM
2.52424e-81	-1.22861	0.198	0.74	8.50517e-77	Tissue_stem_cells	SRGN
4.91361e-78	-1.44275	0.024	0.479	1.65559e-73	Tissue_stem_cells	CORO1A
9.44398e-78	-1.06468	0.455	0.882	3.18205e-73	Tissue_stem_cells	MT-CO1
7.59246e-77	-1.21357	0.022	0.473	2.5582e-72	Tissue_stem_cells	PTPRC
3.08759e-70	-1.12428	0.064	0.513	1.04033e-65	Tissue_stem_cells	DUSP2
2.45387e-64	-1.77365	0.04	0.451	8.26807e-60	Tissue_stem_cells	AREG
8.27225e-45	-1.00752	0.104	0.46	2.78725e-40	Tissue_stem_cells	HLA-DPB1
2.36068e-12	-1.62566	0.307	0.585	7.95408e-08	Tissue_stem_cells	SCGB1A1
2.47754e-08	-1.18354	0.311	0.545	0.000834781	Tissue_stem_cells	SCGB3A1
0	3.66413	0.887	0.016	0	Endothelial_cells	CLDN5
0	3.33377	0.879	0.024	0	Endothelial_cells	TIMP3
0	3.08371	0.658	0.034	0	Endothelial_cells	MGP
0	2.99385	0.879	0.036	0	Endothelial_cells	TM4SF1
0	2.89285	0.814	0.066	0	Endothelial_cells	EPAS1
0	2.81779	0.788	0.032	0	Endothelial_cells	SDPR
0	2.77005	0.567	0.032	0	Endothelial_cells	MT1M
0	2.75579	0.541	0.024	0	Endothelial_cells	C10orf10
0	2.72409	0.697	0.008	0	Endothelial_cells	VWF
0	2.69448	0.797	0.032	0	Endothelial_cells	HYAL2
0	2.69036	0.883	0.012	0	Endothelial_cells	RAMP2
0	2.59721	0.623	0.013	0	Endothelial_cells	SPARCL1
0	2.43503	0.788	0.026	0	Endothelial_cells	TFPI
0	2.41961	0.771	0.043	0	Endothelial_cells	RNASE1
0	2.3782	0.455	0.006	0	Endothelial_cells	TMEM100
0	2.34995	0.762	0.015	0	Endothelial_cells	GNG11
0	2.32376	0.667	0.05	0	Endothelial_cells	ADIRF
0	2.20594	0.619	0.012	0	Endothelial_cells	AQP1
0	2.19377	0.81	0.021	0	Endothelial_cells	CAV1
0	2.15579	0.511	0.019	0	Endothelial_cells	PTGDS
0	2.14603	0.589	0.005	0	Endothelial_cells	RAMP3
0	2.10227	0.628	0.048	0	Endothelial_cells	EMP1
0	2.06552	0.775	0.073	0	Endothelial_cells	PECAM1
0	2.04796	0.662	0.004	0	Endothelial_cells	CLEC14A
0	2.0154	0.671	0.029	0	Endothelial_cells	NNMT
0	2.01159	0.576	0.008	0	Endothelial_cells	FAM107A
0	1.89856	0.667	0.043	0	Endothelial_cells	SLC9A3R2
0	1.86948	0.766	0.014	0	Endothelial_cells	PTRF
0	1.84026	0.662	0.05	0	Endothelial_cells	ENG
0	1.81958	0.701	0.016	0	Endothelial_cells	EGFL7
0	1.78379	0.61	0.004	0	Endothelial_cells	PTPRB
0	1.78053	0.58	0.011	0	Endothelial_cells	LIFR
0	1.69507	0.675	0.022	0	Endothelial_cells	IGFBP4
0	1.68589	0.619	0.006	0	Endothelial_cells	CALCRL
0	1.67494	0.641	0.026	0	Endothelial_cells	A2M
0	1.62829	0.662	0.027	0	Endothelial_cells	NPDC1
0	1.61296	0.675	0.018	0	Endothelial_cells	ECSCR.1
0	1.53181	0.554	0.005	0	Endothelial_cells	TSPAN7
0	1.52974	0.537	0.005	0	Endothelial_cells	SLCO2A1
0	1.47634	0.623	0.046	0	Endothelial_cells	CNN3
0	1.46306	0.641	0.016	0	Endothelial_cells	CALD1
0	1.36986	0.515	0.022	0	Endothelial_cells	PLPP1
0	1.36908	0.558	0.003	0	Endothelial_cells	LDB2
0	1.25981	0.545	0.012	0	Endothelial_cells	PCAT19
0	1.25924	0.463	0.008	0	Endothelial_cells	TINAGL1
0	1.2437	0.502	0.012	0	Endothelial_cells	IL33
0	1.22787	0.515	0.011	0	Endothelial_cells	ARHGAP29
0	1.20788	0.489	0.019	0	Endothelial_cells	ACVRL1
0	1.19092	0.593	0.02	0	Endothelial_cells	CAV2
0	1.18456	0.571	0.026	0	Endothelial_cells	S100A16
0	1.1676	0.45	0.002	0	Endothelial_cells	CDH5
5.47143e-308	1.02633	0.455	0.025	1.84354e-303	Endothelial_cells	PROCR
3.5854e-296	1.58159	0.658	0.059	1.20806e-291	Endothelial_cells	CRIP2
4.00926e-292	1.2469	0.485	0.03	1.35088e-287	Endothelial_cells	CD93
4.87388e-282	3.38725	0.84	0.113	1.6422e-277	Endothelial_cells	IFI27
3.29214e-280	1.53904	0.563	0.044	1.10925e-275	Endothelial_cells	CTNNAL1
6.65694e-275	1.38174	0.671	0.067	2.24299e-270	Endothelial_cells	SPTBN1
3.96091e-270	2.59967	0.727	0.084	1.33459e-265	Endothelial_cells	GPX3
2.8201e-263	1.14315	0.524	0.04	9.50205e-259	Endothelial_cells	NFIB
2.43695e-259	1.44186	0.615	0.058	8.21106e-255	Endothelial_cells	TCF4
7.74788e-258	1.075	0.455	0.03	2.61057e-253	Endothelial_cells	MTUS1
7.66354e-250	2.786	0.97	0.191	2.58215e-245	Endothelial_cells	IFITM3
7.92553e-232	1.14774	0.645	0.071	2.67043e-227	Endothelial_cells	EMP2
3.44696e-228	1.15074	0.55	0.053	1.16142e-223	Endothelial_cells	WBP5
9.36594e-226	2.07635	0.667	0.081	3.15576e-221	Endothelial_cells	PRSS23
3.82136e-222	1.58569	0.71	0.096	1.28757e-217	Endothelial_cells	APP
2.64292e-218	2.80526	0.775	0.118	8.90507e-214	Endothelial_cells	CLU
9.21607e-203	1.9638	0.615	0.075	3.10526e-198	Endothelial_cells	TNFSF10
1.06029e-196	3.58044	0.879	0.192	3.57254e-192	Endothelial_cells	IGFBP7
5.60766e-196	2.23049	0.753	0.118	1.88944e-191	Endothelial_cells	ID1
3.08089e-194	1.11806	0.481	0.046	1.03808e-189	Endothelial_cells	GAS6
4.36149e-192	1.85478	0.797	0.145	1.46956e-187	Endothelial_cells	PDLIM1
8.78458e-183	2.11401	0.58	0.075	2.95988e-178	Endothelial_cells	PDK4
3.95507e-175	1.07939	0.541	0.066	1.33262e-170	Endothelial_cells	TPM1
3.70755e-173	1.38401	0.571	0.076	1.24922e-168	Endothelial_cells	TGM2
1.69358e-171	3.46981	0.667	0.106	5.70634e-167	Endothelial_cells	CXCL2
7.265e-171	2.06437	0.671	0.108	2.44787e-166	Endothelial_cells	EGR1
9.76981e-163	2.08725	0.745	0.147	3.29184e-158	Endothelial_cells	KLF4
3.25855e-158	1.61687	0.619	0.095	1.09794e-153	Endothelial_cells	THBD
1.1615e-155	1.68263	0.684	0.122	3.91356e-151	Endothelial_cells	ID3
1.81948e-154	1.66853	0.775	0.165	6.13055e-150	Endothelial_cells	STOM
7.12206e-149	1.22789	0.628	0.109	2.39971e-144	Endothelial_cells	CD151
6.05094e-145	1.74401	0.835	0.201	2.0388e-140	Endothelial_cells	CD59
3.20736e-140	1.11483	0.511	0.072	1.08069e-135	Endothelial_cells	PRCP
1.51337e-139	2.43659	0.87	0.27	5.09914e-135	Endothelial_cells	SOCS3
9.66064e-136	1.76566	0.892	0.289	3.25506e-131	Endothelial_cells	FKBP1A
7.79562e-123	1.88435	0.784	0.227	2.62666e-118	Endothelial_cells	BST2
8.31638e-121	1.56531	0.74	0.189	2.80212e-116	Endothelial_cells	YBX3
1.51977e-119	1.28945	0.749	0.18	5.12073e-115	Endothelial_cells	VAMP5
1.09681e-118	1.8514	0.766	0.198	3.69559e-114	Endothelial_cells	CEBPD
4.79936e-113	1.3103	0.697	0.161	1.61709e-108	Endothelial_cells	GSN
7.95238e-113	2.73274	0.623	0.138	2.67947e-108	Endothelial_cells	MT1E
2.86754e-106	1.22633	0.589	0.123	9.66189e-102	Endothelial_cells	TACC1
5.4699e-106	1.65681	0.545	0.103	1.84303e-101	Endothelial_cells	HES1
6.06242e-106	1.04309	0.528	0.099	2.04267e-101	Endothelial_cells	NEDD9
1.34165e-98	1.1706	0.472	0.087	4.52057e-94	Endothelial_cells	KCTD12
2.92224e-98	2.6004	0.645	0.169	9.84619e-94	Endothelial_cells	MT1X
1.57714e-96	1.03311	0.481	0.091	5.31403e-92	Endothelial_cells	TNFRSF1A
5.98405e-94	1.61635	0.978	0.608	2.01627e-89	Endothelial_cells	ITM2B
1.84082e-92	1.04629	0.684	0.185	6.20245e-88	Endothelial_cells	RHOC
4.81969e-89	1.54136	0.792	0.25	1.62395e-84	Endothelial_cells	TIMP1
2.60033e-87	1.96718	0.857	0.369	8.76156e-83	Endothelial_cells	JUN
1.35129e-86	1.15231	0.472	0.096	4.55303e-82	Endothelial_cells	WARS
1.38435e-83	1.07323	0.81	0.288	4.66443e-79	Endothelial_cells	LAPTM4A
7.97138e-83	1.56073	0.593	0.156	2.68588e-78	Endothelial_cells	RHOB
1.30549e-82	1.05369	0.697	0.214	4.39871e-78	Endothelial_cells	RAB11A
2.26475e-82	1.329	0.519	0.115	7.63085e-78	Endothelial_cells	TSC22D1
4.17336e-79	1.20336	0.853	0.38	1.40617e-74	Endothelial_cells	RAC1
5.20365e-78	2.82888	0.9	0.449	1.75332e-73	Endothelial_cells	MT2A
7.35574e-78	1.51318	0.97	0.682	2.47844e-73	Endothelial_cells	HLA-E
8.89085e-78	1.55353	0.714	0.239	2.99568e-73	Endothelial_cells	HSPB1
5.81706e-77	1.04683	0.563	0.135	1.96e-72	Endothelial_cells	GIMAP7
5.4002e-74	1.01561	0.541	0.138	1.81955e-69	Endothelial_cells	NFKBIZ
2.02757e-70	1.05515	0.485	0.115	6.83169e-66	Endothelial_cells	ICAM2
4.68987e-70	1.8849	0.879	0.494	1.58021e-65	Endothelial_cells	FOS
1.35146e-67	1.21346	0.61	0.19	4.5536e-63	Endothelial_cells	IFNGR1
7.26273e-61	1.35147	0.931	0.577	2.4471e-56	Endothelial_cells	VIM
5.83187e-60	-1.19385	0.961	0.929	1.96499e-55	Endothelial_cells	RPLP1
9.16437e-59	1.34441	0.944	0.612	3.08784e-54	Endothelial_cells	DUSP1
8.52993e-58	1.00025	0.874	0.524	2.87407e-53	Endothelial_cells	MYL12B
1.60301e-57	-3.1416	0.147	0.667	5.40118e-53	Endothelial_cells	CXCR4
4.31658e-56	1.39422	0.727	0.328	1.45443e-51	Endothelial_cells	FOSB
5.41602e-56	1.52577	0.926	0.69	1.82487e-51	Endothelial_cells	ZFP36
1.07571e-51	1.14873	0.827	0.409	3.62451e-47	Endothelial_cells	TXNIP
1.70313e-50	1.30311	0.684	0.292	5.73854e-46	Endothelial_cells	IRF1
3.41573e-50	-1.26217	0.866	0.866	1.15089e-45	Endothelial_cells	RPL28
5.72564e-50	-1.34886	0.952	0.911	1.9292e-45	Endothelial_cells	RPS27
8.12504e-43	-1.11071	0.905	0.913	2.73765e-38	Endothelial_cells	RPS2
6.18115e-42	1.35303	0.693	0.324	2.08268e-37	Endothelial_cells	GADD45B
1.83962e-40	-1.03725	0.961	0.915	6.19841e-36	Endothelial_cells	RPL21
2.25532e-40	-1.01325	0.957	0.899	7.59908e-36	Endothelial_cells	RPS19
2.72863e-40	1.11757	0.645	0.31	9.19386e-36	Endothelial_cells	PPP1R15A
3.37911e-39	1.01362	0.866	0.553	1.13856e-34	Endothelial_cells	NFKBIA
1.73769e-38	-1.03311	0.926	0.893	5.85497e-34	Endothelial_cells	RPLP2
3.70919e-37	-1.84834	0.359	0.674	1.24978e-32	Endothelial_cells	CYBA
7.61297e-36	1.19844	0.771	0.461	2.56511e-31	Endothelial_cells	IER2
9.91413e-36	-1.47106	0.035	0.464	3.34047e-31	Endothelial_cells	PTPRC
2.03661e-35	-2.07585	0.177	0.559	6.86216e-31	Endothelial_cells	CD52
1.84013e-34	-1.07603	0.896	0.879	6.20012e-30	Endothelial_cells	RPL23A
2.77383e-34	-1.60207	0.061	0.47	9.34613e-30	Endothelial_cells	CORO1A
3.31529e-33	-1.03059	0.939	0.889	1.11705e-28	Endothelial_cells	RPS12
8.3901e-33	-1.11138	0.879	0.847	2.82696e-28	Endothelial_cells	RPL39
8.74237e-31	-1.18048	0.861	0.845	2.94565e-26	Endothelial_cells	RPS29
1.71703e-30	-1.80507	0.139	0.503	5.78538e-26	Endothelial_cells	DUSP2
2.54562e-30	-1.03685	0.883	0.872	8.57723e-26	Endothelial_cells	RPS3
4.67866e-29	-1.00593	0.887	0.866	1.57643e-24	Endothelial_cells	RPL30
5.33138e-29	-1.79285	0.195	0.532	1.79635e-24	Endothelial_cells	CREM
4.22594e-27	-1.02061	0.823	0.827	1.42389e-22	Endothelial_cells	RPL14
4.88093e-23	-1.60141	0.342	0.62	1.64458e-18	Endothelial_cells	S100A4
2.71375e-22	-1.09873	0.74	0.783	9.14372e-18	Endothelial_cells	RPSA
3.27251e-21	-1.25594	0.238	0.514	1.10264e-16	Endothelial_cells	LAPTM5
2.34351e-20	-1.26635	0.515	0.663	7.89622e-16	Endothelial_cells	SARAF
8.95922e-20	-1.44619	0.788	0.774	3.01872e-15	Endothelial_cells	BTG1
1.78506e-18	-1.19075	0.463	0.622	6.01457e-14	Endothelial_cells	ARHGDIB
9.8864e-15	-1.4981	0.589	0.667	3.33113e-10	Endothelial_cells	ZFP36L2
