# Supplementary material for: Potential marker genes for chronic obstructive pulmonary disease revealed based on single-cell sequencing and Mendelian randomization analysis
Source: Aging (Albany NY). 2024 May 23;16(10):8922–43. doi: 10.18632/aging.205849 (PMC11164476; doi:10.18632/aging.205849)
Supplement: Supplementary Table 2 [file aging-16-205849-s003.xls]

Supplementary Table 2. 120 pairs of marker genes causally associated with COPD.
SNP	chr	pos	effect_allele	other_allele	beta	se	pval	Symbol
rs852243	5	35923830	A	T	0.116634	0.0119408	1.55E-22	IL7R
rs10058453	5	35880820	T	C	-0.424193	0.0121717	1.00E-200	IL7R
rs116462334	5	36029824	C	T	-0.24657	0.0425303	6.73E-09	IL7R
rs3869109	6	31184196	G	A	0.0694802	0.0120525	8.17E-09	IL7R
rs504848	1	160794497	T	C	0.0725554	0.0119693	1.35E-09	CCR7
rs1386622	4	38372055	G	T	0.0824578	0.0126053	6.09E-11	CCR7
rs3177928	6	32412435	A	G	0.0978931	0.0164242	2.52E-09	CCR7
rs9894823	17	38772965	T	C	0.123492	0.0118615	2.20E-25	CCR7
rs714027	22	30577771	G	A	-0.0890818	0.0118983	7.06E-14	CCR7
rs2497306	10	94485211	C	A	-0.083539	0.0118827	2.06E-12	CD3D
rs2276423	11	118210106	C	G	-0.206634	0.0135238	1.05E-52	CD3D
rs773125	12	56394954	G	A	-0.0755475	0.0123108	8.42E-10	CD3D
rs2617170	12	10560957	C	T	0.0747223	0.0126229	3.23E-09	CD3D
rs12542809	8	29902124	A	G	-0.288249	0.0156057	3.56E-76	SARAF
rs4065321	17	38143548	T	C	-0.0791245	0.0119224	3.21E-11	JUNB
rs4804732	19	12922503	G	A	-0.0807294	0.012445	8.77E-11	JUNB
rs78851916	8	29891738	T	G	-0.222553	0.0236578	5.09E-21	LEPROTL1
rs12155727	8	29962386	A	G	0.906789	0.0264021	1.00E-200	LEPROTL1
rs4759185	12	56059947	C	T	-0.098211	0.0138593	1.38E-12	CD63
rs55927117	12	56070774	A	G	-0.222284	0.0129457	4.41E-66	CD63
rs2480695	1	153508996	G	T	-0.222878	0.0206323	3.35E-27	S100A6
rs149110519	6	144385777	T	C	0.165608	0.0266213	4.95E-10	S100A6
rs9277935	6	33160425	T	G	-0.400318	0.0141843	3.07E-175	HLA-DPB1
rs7764190	6	32995451	A	G	-0.340019	0.0222393	9.03E-53	HLA-DPB1
rs115608589	6	32440852	A	G	-0.218545	0.0376802	6.62E-09	HLA-DPB1
rs147926086	6	33010407	A	G	0.476848	0.0485436	8.96E-23	HLA-DPB1
rs11965463	6	32979677	A	G	-0.530068	0.0288396	1.90E-75	HLA-DPB1
rs2305480	17	38062196	A	G	-0.0734472	0.0119728	8.54E-10	CD74
rs4810485	20	44747947	G	T	-0.0813184	0.0136704	2.71E-09	CD74
rs13203715	6	32988588	G	A	-0.389618	0.0179523	1.92E-104	HLA-DPA1
rs386879	6	33506733	A	T	0.107118	0.0130295	2.01E-16	HLA-DPA1
rs114390018	6	33029384	T	C	-0.739853	0.015702	1.00E-200	HLA-DPA1
rs13330176	16	86019087	A	T	-0.105538	0.0144251	2.55E-13	HLA-DPA1
rs6906662	6	32266506	A	G	-0.194559	0.023977	4.88E-16	HLA-DRA
rs9273500	6	32628342	C	T	0.164541	0.0146379	2.57E-29	HLA-DRA
rs13330176	16	86019087	A	T	-0.0953195	0.0144301	3.95E-11	HLA-DRA
rs28819133	6	32527988	T	C	-0.0979231	0.0149346	5.49E-11	HLA-DRB1
rs9268504	6	32377116	G	C	-0.427674	0.0113543	1.00E-200	HLA-DRB1
rs9268528	6	32383108	G	A	-0.240084	0.0121293	3.37E-87	HLA-DRB1
rs9273595	6	32629091	G	C	-0.118553	0.0151064	4.23E-15	HLA-DRB1
rs2999552	1	152008766	A	T	0.531691	0.0274716	1.89E-83	S100A11
rs140789324	1	151856415	A	G	0.23762	0.0407045	5.30E-09	S100A11
rs12264390	10	959111	C	T	-0.0906695	0.0145584	4.72E-10	S100A11
rs1049254	16	88709828	G	A	-0.311347	0.0119909	1.22E-148	CYBA
rs12597572	16	88656044	G	A	-0.17596	0.0151207	2.67E-31	CYBA
rs826415	1	118153977	G	T	0.0951035	0.0128612	1.42E-13	MYL6
rs1354034	3	56849749	C	T	0.0706989	0.0122359	7.56E-09	MYL6
rs35436573	12	56553009	A	G	0.29408	0.0219764	7.75E-41	MYL6
rs9402686	6	135427817	A	G	-0.102067	0.0133404	1.99E-14	MT2A
rs9268839	6	32428772	G	A	0.0922431	0.0121052	2.54E-14	MT2A
rs12447019	16	56699756	G	T	-0.301727	0.0117362	9.23E-146	MT2A
rs143239220	16	56426775	C	A	-0.253118	0.018862	4.64E-41	MT2A
rs12922308	16	56621367	T	C	0.4738	0.0114517	1.00E-200	MT2A
rs35033748	17	27179590	C	T	-0.101823	0.0144449	1.80E-12	MT2A
rs56377005	17	4802829	A	G	0.52924	0.0481543	4.25E-28	PFN1
rs6986779	8	142337790	T	C	0.107997	0.0124456	4.05E-18	SAT1
rs56308618	21	44757792	A	G	0.105221	0.0127681	1.71E-16	CSTB
rs3761385	21	45198355	G	T	-0.515958	0.0119778	1.00E-200	CSTB
rs11539534	21	45168884	A	G	-0.71134	0.0183414	1.00E-200	CSTB
rs4819321	21	45268728	T	C	-0.212154	0.0128116	1.37E-61	CSTB
rs10489481	1	185391167	A	G	0.0771245	0.0128027	1.70E-09	GNLY
rs140546452	2	85957161	T	C	0.689891	0.0543285	6.04E-37	GNLY
rs189750681	2	85639364	A	G	0.571042	0.0504387	1.03E-29	GNLY
rs55844419	2	85664418	T	C	0.397973	0.0212986	6.53E-78	GNLY
rs3024798	2	85894308	T	G	-0.594205	0.0111711	1.00E-200	GNLY
rs1559964	2	145343426	G	C	0.137551	0.0171705	1.14E-15	GNLY
rs2524079	6	31242174	A	G	-0.0719063	0.0119408	1.72E-09	GNLY
rs7464572	8	145021167	G	C	0.0999938	0.0122595	3.45E-16	GNLY
rs2290400	17	38066240	C	T	-0.0771779	0.0118869	8.43E-11	GNLY
rs10489481	1	185391167	A	G	0.105455	0.0127883	1.63E-16	NKG7
rs3745403	19	51871195	A	G	-0.113668	0.0121779	1.02E-20	NKG7
rs12978391	19	51885010	T	C	-0.368761	0.0130231	2.21E-176	NKG7
rs8021947	14	25111338	A	T	-0.15851	0.0118391	7.03E-41	GZMB
rs8192921	14	25099908	T	A	-0.520153	0.0133969	1.00E-200	GZMB
rs9303280	17	38074031	C	T	0.0835724	0.0118859	2.05E-12	GZMB
rs445	7	92408370	T	C	0.123259	0.0203818	1.47E-09	CST7
rs56388170	7	28724374	T	G	-0.0851558	0.0131078	8.21E-11	CST7
rs8118803	20	25026164	T	C	0.207665	0.0167277	2.18E-35	CST7
rs6036619	20	24010555	A	G	0.100799	0.0163365	6.82E-10	CST7
rs2183695	20	24828229	C	T	0.669644	0.0170615	1.00E-200	CST7
rs6138534	20	25176855	C	G	-0.230151	0.0145333	1.75E-56	CST7
rs658006	11	64664774	T	C	-0.0897573	0.0129479	4.14E-12	CTSW
rs625750	11	64977644	T	C	0.109309	0.0119164	4.61E-20	CTSW
rs7932285	11	65462981	G	A	-1.5589	0.0384201	1.00E-200	CTSW
rs10501397	11	66272976	A	C	0.104011	0.0136071	2.11E-14	CTSW
rs148654891	11	65575263	A	G	-0.995727	0.013347	1.00E-200	CTSW
rs4795397	17	38023745	G	A	-0.0800279	0.0119109	1.83E-11	CTSW
rs10489481	1	185391167	A	G	0.121229	0.0127784	2.38E-21	FGFBP2
rs10939643	4	15947088	T	C	-0.498045	0.0115921	1.00E-200	FGFBP2
rs2617170	12	10560957	C	T	-0.0863599	0.0126176	7.69E-12	FGFBP2
rs55908509	19	16442019	A	G	-0.169773	0.0125924	1.99E-41	FGFBP2
rs10732976	1	185409061	A	G	-0.105869	0.0130168	4.18E-16	GZMH
rs2153271	9	16864521	T	C	-0.0954388	0.0119391	1.31E-15	GZMH
rs9420589	10	94450233	T	G	-0.0838923	0.0120057	2.79E-12	GZMH
rs11065987	12	112072424	G	A	-0.092437	0.0122329	4.14E-14	GZMH
rs75812942	14	24960158	C	T	0.10827	0.0183635	3.73E-09	GZMH
rs4982988	14	25160344	T	C	0.190668	0.0118066	1.15E-58	GZMH
rs7911264	10	94436851	C	T	-0.0705089	0.0118942	3.07E-09	PRF1
rs74513535	10	72357635	G	A	-0.557928	0.0467856	8.75E-33	PRF1
rs2290400	17	38066240	C	T	-0.0882966	0.0118814	1.07E-13	PRF1
rs7310615	12	111865049	G	C	-0.0768476	0.0119195	1.14E-10	CD7
rs144753909	17	80369180	T	C	0.255861	0.0403007	2.17E-10	CD7
rs116065945	17	80269470	T	C	-0.197499	0.0159723	4.03E-35	CD7
rs151018843	3	28324294	C	A	-0.19468	0.0338003	8.42E-09	CMC1
rs17021298	3	28296690	G	A	0.402828	0.0151054	1.11E-156	CMC1
rs115319228	3	28049016	C	A	-0.323537	0.0474917	9.59E-12	CMC1
rs2247056	6	31265490	C	T	0.0821723	0.0137917	2.55E-09	CMC1
rs11053665	12	10345194	A	T	0.12464	0.0186704	2.46E-11	KLRD1
rs11613226	12	10439229	T	C	0.494436	0.0133173	1.00E-200	KLRD1
rs9303277	17	37976469	T	C	-0.0759999	0.0118863	1.62E-10	KLRD1
rs66846694	5	55041943	A	G	0.139757	0.0213696	6.16E-11	GZMA
rs58433852	5	54426834	T	C	0.377194	0.0252574	1.98E-50	GZMA
rs6891823	5	54317900	T	C	0.0993841	0.011954	9.25E-17	GZMA
rs2247056	6	31265490	C	T	0.105789	0.0137803	1.63E-14	GZMA
rs9303277	17	37976469	T	C	-0.0736777	0.0118873	5.73E-10	GZMA
rs2497306	10	94485211	C	A	-0.069773	0.011889	4.39E-09	IL32
rs1064948	16	3106994	T	A	0.511411	0.0116945	1.00E-200	IL32
rs2526265	16	3059206	G	A	-0.0905431	0.0122785	1.65E-13	IL32
rs2472684	16	3132026	C	A	0.750333	0.0268923	2.58E-171	IL32
rs2238397	16	3245197	G	C	0.092853	0.0156603	3.04E-09	IL32
rs2153271	9	16864521	T	C	-0.0690931	0.011952	7.43E-09	HCST
rs2285423	19	36497373	G	A	-0.281064	0.0407322	5.19E-12	HCST
rs9260191	6	29912398	G	A	0.379562	0.0114733	1.00E-200	HLA-A
rs2524188	6	30422915	T	G	-0.107323	0.0120905	6.89E-19	HLA-A
rs2844841	6	29740166	C	A	0.461157	0.0121916	1.00E-200	HLA-A
rs1532624	16	57005479	A	C	-0.0760086	0.0119817	2.24E-10	HLA-A
rs2949669	1	167417884	T	C	0.395619	0.0119022	1.00E-200	CD247
rs1404567	1	167408874	G	A	-0.133857	0.0174098	1.49E-14	CD247
rs10489481	1	185391167	A	G	0.0892901	0.0127971	3.01E-12	CD247
rs2617170	12	10560957	C	T	-0.0757295	0.0126224	1.98E-09	CD247
rs3131619	6	31434331	T	A	-0.11885	0.0191953	5.95E-10	TRBC1
rs3130941	6	31197514	G	C	-0.154268	0.0163834	4.69E-21	TRBC1
rs1799886	7	142498523	C	T	-0.0965983	0.012063	1.17E-15	TRBC1
rs6464510	7	142341323	G	A	-0.13162	0.0119482	3.21E-28	TRBC1
rs12778560	10	74309485	T	G	0.109658	0.0123688	7.60E-19	DDIT4
rs148410808	6	159018798	G	A	-0.322263	0.0532913	1.47E-09	SYTL3
rs117299465	6	159137806	A	G	-0.719704	0.0438799	1.86E-60	SYTL3
rs146732402	6	159239449	A	G	-0.173952	0.0281785	6.68E-10	SYTL3
rs7310410	12	10057441	T	A	-0.076371	0.0125233	1.07E-09	CD69
rs115589984	6	30941209	A	G	-0.246077	0.0408637	1.72E-09	HLA-C
rs114425848	6	31032977	T	C	-0.50981	0.0444082	1.66E-30	HLA-C
rs2517521	6	31027336	G	A	-0.805121	0.0166623	1.00E-200	HLA-C
rs6899983	6	31758931	C	A	-0.326386	0.0421666	9.89E-15	HLA-C
rs886422	6	30864279	T	C	0.709761	0.0179868	1.00E-200	HLA-C
rs187862025	6	32017524	G	A	-0.304672	0.037053	1.99E-16	HLA-C
rs139124591	6	30928486	A	G	-0.413003	0.0385851	9.77E-27	HLA-C
rs116302426	6	30980781	A	G	-0.308121	0.0426848	5.25E-13	HLA-C
rs12524498	6	31444187	T	G	-0.411238	0.0371177	1.58E-28	HLA-C
rs11575852	6	31647001	G	A	-0.406881	0.0326333	1.11E-35	HLA-C
rs11576015	6	31795345	A	G	-0.359313	0.0388803	2.43E-20	HLA-C
rs6751622	2	43715824	G	A	0.107335	0.0120324	4.64E-19	ZFP36L2
rs146330095	10	35394572	C	G	-0.188714	0.0155979	1.07E-33	CREM
rs141094656	1	92753336	C	T	0.272977	0.0429669	2.11E-10	SCGB3A1
rs3797102	5	180055188	G	A	0.214845	0.0117931	3.73E-74	SCGB3A1
rs11952080	5	180194134	T	C	0.0962786	0.0159862	1.72E-09	SCGB3A1
rs62405464	5	179879758	C	T	0.574428	0.0136026	1.00E-200	SCGB3A1
rs77831883	5	179779124	A	G	0.405677	0.0407273	2.27E-23	SCGB3A1
rs146435220	5	180109906	A	G	0.300239	0.0376277	1.47E-15	SCGB3A1
rs3006485	1	153357021	A	G	0.445526	0.0190477	5.43E-121	S100A8
rs1560832	1	153335384	A	G	-0.262731	0.0131875	2.58E-88	S100A8
rs11205279	1	153358685	T	C	0.56991	0.0188333	1.00E-200	S100A9
rs1560833	1	153334525	A	G	-0.230923	0.0132647	7.05E-68	S100A9
rs2076359	1	209823970	T	C	-0.224481	0.0137638	8.43E-60	G0S2
rs74399656	1	209869456	T	C	-0.127483	0.0178757	9.92E-13	G0S2
rs56330463	5	148200011	C	T	-0.116594	0.0120273	3.20E-22	G0S2
rs34856868	1	92554283	A	G	0.228113	0.0384269	2.92E-09	LYZ
rs149007767	7	50370254	T	C	-0.10114	0.0166599	1.27E-09	LYZ
rs73140579	12	69904574	G	A	0.239449	0.0338507	1.51E-12	LYZ
rs143630136	12	69721929	T	C	0.893578	0.036933	2.55E-129	LYZ
rs117605376	12	69218646	A	C	-0.248958	0.0390719	1.87E-10	LYZ
rs7961809	12	69497995	G	A	-0.22985	0.0150837	1.97E-52	LYZ
rs117061487	12	69709121	T	C	-0.818325	0.031078	8.38E-153	LYZ
rs142392948	12	70064301	G	A	-0.354605	0.0327163	2.25E-27	LYZ
rs73141969	12	69614374	A	G	0.77859	0.0151113	1.00E-200	LYZ
rs117010946	12	69888875	T	C	-0.302626	0.0437144	4.43E-12	LYZ
rs17813869	12	70341563	A	G	0.319369	0.0348223	4.67E-20	LYZ
rs79282662	6	32111239	A	G	0.365969	0.0252806	1.71E-47	LST1
rs12192286	6	31242845	T	C	-0.148865	0.016482	1.68E-19	LST1
rs149110519	6	144385777	T	C	0.164682	0.0266217	6.17E-10	LST1
rs2229094	6	31540556	C	T	-0.28161	0.0131413	7.11E-102	LST1
rs56388170	7	28724374	T	G	0.0880697	0.0131064	1.82E-11	LST1
rs3774937	4	103434253	C	T	0.0808199	0.0127346	2.20E-10	PLAUR
rs56330463	5	148200011	C	T	-0.170737	0.0119814	4.47E-46	PLAUR
rs56388170	7	28724374	T	G	-0.0948046	0.0131031	4.64E-13	PLAUR
rs77526211	13	40974023	A	G	0.191511	0.0292267	5.66E-11	PLAUR
rs4760	19	44153100	G	A	0.199316	0.017283	9.06E-31	PLAUR
rs56681946	19	44283031	C	T	0.118559	0.0122554	3.89E-22	PLAUR
rs56330463	5	148200011	C	T	-0.0854038	0.0120458	1.34E-12	NAMPT
rs3801267	7	105918922	T	A	-0.126951	0.0123104	6.19E-25	NAMPT
rs6968555	7	106072993	A	C	-0.0728526	0.0122244	2.53E-09	NAMPT
rs3859192	17	38128648	T	C	0.0727732	0.0119351	1.08E-09	NAMPT
rs3093949	6	31525184	T	C	-0.132737	0.0126083	6.43E-26	AIF1
rs14365	6	31635710	C	T	-0.286342	0.0148274	4.27E-83	AIF1
rs9267798	6	32044834	C	G	-0.165271	0.0222864	1.21E-13	AIF1
rs149007767	7	50370254	T	C	-0.219468	0.016579	5.31E-40	AIF1
rs3790455	1	156456301	T	C	-0.0916468	0.0125444	2.76E-13	THBS1
rs1354034	3	56849749	C	T	0.36582	0.0118571	1.00E-200	THBS1
rs3733018	3	187456594	C	A	0.0830308	0.0123906	2.07E-11	THBS1
rs114694170	5	88180196	C	T	0.154463	0.0266978	7.23E-09	THBS1
rs505404	11	243268	G	T	0.167071	0.0142512	9.69E-32	THBS1
rs11553699	12	122216910	G	A	0.153595	0.0190061	6.41E-16	THBS1
rs10876550	12	54712308	A	G	0.0969161	0.0120739	9.99E-16	THBS1
rs1822105	15	39634303	C	T	0.459338	0.0113778	1.00E-200	THBS1
rs10152469	15	39584031	G	T	0.383068	0.0121134	1.00E-200	THBS1
rs72727034	15	39994050	A	G	0.355116	0.0332902	1.45E-26	THBS1
rs11653357	17	33923607	A	G	0.101436	0.0155696	7.27E-11	THBS1
rs141094656	1	92753336	C	T	0.318431	0.0429447	1.22E-13	CST3
rs9880192	3	128297569	C	G	-0.0711889	0.0121717	4.95E-09	CST3
rs4761234	12	69732105	C	T	0.0816979	0.0119223	7.26E-12	CST3
rs2239630	14	23589349	G	A	0.0941137	0.0118859	2.41E-15	CST3
rs2405392	20	23569186	T	C	-0.761783	0.0127519	1.00E-200	CST3
rs77550063	20	24122005	A	C	0.154666	0.0231134	2.21E-11	CST3
rs10485640	20	23149739	G	A	-0.191501	0.0194748	8.08E-23	CST3
rs149586754	20	23454006	A	G	0.282759	0.0457361	6.32E-10	CST3
rs7530560	1	161210729	C	T	-0.138157	0.0124996	2.12E-28	FCER1G
rs4233366	1	161159147	T	C	0.808905	0.0117152	1.00E-200	FCER1G
rs143135133	1	161383559	C	A	-0.329885	0.0450096	2.31E-13	FCER1G
rs149007767	7	50370254	T	C	-0.1757	0.0166159	3.92E-26	FCER1G
rs141094656	1	92753336	C	T	0.247321	0.0429779	8.70E-09	VCAN
rs1375493	2	182323766	A	G	0.10899	0.0119705	8.63E-20	VCAN
rs9880192	3	128297569	C	G	-0.0797284	0.012168	5.66E-11	VCAN
rs309560	5	82832139	G	C	-0.0841617	0.0118825	1.41E-12	VCAN
rs7785014	7	137881690	C	T	0.10635	0.0126097	3.34E-17	VCAN
rs10980797	9	113912553	G	A	-0.0926346	0.0118964	6.87E-15	VCAN
rs35979828	12	54685880	T	C	-0.165924	0.0256111	9.24E-11	VCAN
rs8022179	14	103847287	A	T	0.0856936	0.0133535	1.39E-10	VCAN
rs424971	16	85946450	C	T	-0.0967559	0.0120247	8.51E-16	VCAN
rs247867	16	84598449	G	A	-0.263337	0.0191002	3.05E-43	COTL1
rs4782640	16	84637174	C	A	-0.0975305	0.0120273	5.10E-16	COTL1
rs2966305	16	84650527	T	C	0.0825864	0.0119777	5.39E-12	COTL1
rs4806227	19	36401012	A	G	-0.54938	0.0295248	2.79E-77	TYROBP
rs56330463	5	148200011	C	T	-0.0730279	0.0120516	1.36E-09	C5AR1
rs61091270	19	47909360	G	A	0.210474	0.0237204	7.12E-19	C5AR1
rs72696855	1	150364873	A	G	-0.364623	0.0191043	3.30E-81	CTSS
rs141094656	1	92753336	C	T	0.303955	0.0429522	1.48E-12	CTSS
rs2065901	1	150652420	A	T	0.443372	0.0115002	1.00E-200	CTSS
rs7563201	2	43561780	A	G	-0.0729076	0.0119146	9.39E-10	CTSS
rs1375493	2	182323766	A	G	0.0790494	0.0119872	4.26E-11	CTSS
rs6782228	3	128323424	C	G	-0.0818704	0.0133309	8.18E-10	CTSS
rs149007767	7	50370254	T	C	-0.124961	0.0166484	6.10E-14	CTSS
rs10980800	9	113915905	C	T	0.0869794	0.0142767	1.11E-09	CTSS
rs134975	22	50936324	C	T	0.445029	0.0114961	1.00E-200	TYMP
rs62241209	22	50734392	A	G	-0.138532	0.0175047	2.49E-15	TYMP
rs143657796	22	50419197	T	C	0.258562	0.0397537	7.82E-11	TYMP
rs7288050	22	51062718	T	C	0.182053	0.0118062	1.20E-53	TYMP
rs3888396	22	51211392	C	T	-0.145593	0.0187969	9.50E-15	TYMP
rs694243	11	65172197	T	C	-0.279272	0.0136749	1.06E-92	NEAT1
rs12097651	1	158743069	C	T	-0.695505	0.046397	8.48E-51	MNDA
rs857870	1	158813819	G	A	0.490428	0.0113173	1.00E-200	MNDA
rs2479864	1	158565669	A	G	0.134116	0.0223355	1.92E-09	MNDA
rs10187424	2	85794297	C	T	-0.0722153	0.0120403	2.00E-09	MNDA
rs149110519	6	144385777	T	C	-0.176883	0.0266161	3.02E-11	MNDA
rs149007767	7	50370254	T	C	0.197536	0.0165985	1.17E-32	FPR1
rs950893	8	23450510	G	A	0.0807816	0.0124825	9.70E-11	FPR1
rs11667394	19	52234080	G	A	0.237506	0.0122731	1.98E-83	FPR1
rs143540765	19	52513095	C	A	0.313942	0.0420546	8.33E-14	FPR1
rs2198167	19	52177917	T	C	0.120073	0.0182188	4.37E-11	FPR1
rs12610031	19	52348957	G	A	-0.238993	0.0157246	3.60E-52	FPR1
rs5030878	19	52250216	G	A	0.545981	0.013719	1.00E-200	FPR1
rs77199337	3	121971438	G	A	0.278156	0.0157734	1.34E-69	CSTA
rs9862542	3	122210810	A	G	0.404198	0.036092	4.12E-29	CSTA
rs2288678	3	122667277	G	A	-0.151735	0.0200212	3.49E-14	CSTA
rs34408666	3	121981609	A	G	-0.686591	0.016332	1.00E-200	CSTA
rs1449263	2	182319301	T	C	0.0957151	0.0119459	1.12E-15	CD14
rs6782228	3	128323424	C	G	-0.0891801	0.0133276	2.21E-11	CD14
rs148008812	5	140366903	C	A	0.24784	0.0363328	9.03E-12	CD14
rs57599368	5	139992113	G	A	-0.493923	0.0132852	1.00E-200	CD14
rs149007767	7	50370254	T	C	-0.395743	0.0163457	1.70E-129	CD14
rs424971	16	85946450	C	T	-0.0789416	0.012034	5.38E-11	CD14
rs7210990	17	16170764	A	C	0.0848646	0.0118898	9.51E-13	CD14
rs10980797	9	113912553	G	A	-0.0723346	0.0119063	1.24E-09	PSAP
rs4747202	10	73577267	A	G	0.333322	0.0206035	7.23E-59	PSAP
rs10187424	2	85794297	C	T	0.107017	0.0120219	5.50E-19	SLC11A1
rs2230054	2	219000310	T	C	0.228541	0.0117618	4.24E-84	SLC11A1
rs13004810	2	219523436	T	C	0.394403	0.0533236	1.40E-13	SLC11A1
rs7558110	2	219624728	C	T	0.184564	0.0261551	1.71E-12	SLC11A1
rs62182083	2	219201193	A	T	-0.727194	0.0185826	1.00E-200	SLC11A1
rs149110519	6	144385777	T	C	0.429892	0.026411	1.44E-59	SLC11A1
rs149007767	7	50370254	T	C	-0.122404	0.0166498	1.96E-13	SLC11A1
rs56388170	7	28724374	T	G	-0.0999713	0.0131003	2.33E-14	SLC11A1
rs13277976	8	61679038	T	A	-0.10822	0.014479	7.77E-14	SLC11A1
rs56388170	7	28724374	T	G	0.147266	0.0130687	1.88E-29	BCL2A1
rs11854390	15	80224817	T	C	0.145531	0.0119944	7.03E-34	BCL2A1
rs8025805	15	80260274	T	A	-0.207494	0.0137079	9.26E-52	BCL2A1
rs1375493	2	182323766	A	G	0.173881	0.0119161	3.15E-48	MS4A6A
rs2010054	3	128305302	G	A	0.083124	0.012063	5.55E-12	MS4A6A
rs149007767	7	50370254	T	C	-0.100215	0.0166603	1.80E-09	MS4A6A
rs1991866	8	130624105	C	G	-0.092458	0.0120435	1.63E-14	MS4A6A
rs55793580	9	127009395	T	C	-0.101284	0.0158277	1.56E-10	MS4A6A
rs62569723	9	113936919	G	A	0.093605	0.0146958	1.90E-10	MS4A6A
rs1441586	11	59856028	C	T	-0.511642	0.0112232	1.00E-200	MS4A6A
rs73481283	11	60210031	G	C	0.205212	0.035261	5.90E-09	MS4A6A
rs7130322	11	60414821	G	C	-0.107871	0.0182239	3.24E-09	MS4A6A
rs1809125	11	60072678	T	C	-0.145452	0.013033	6.38E-29	MS4A6A
rs597808	12	111973358	G	A	0.0693936	0.0119026	5.54E-09	MS4A6A
rs13330176	16	86019087	A	T	-0.122701	0.0144154	1.71E-17	MS4A6A
rs17196752	20	48887268	T	C	-0.0878249	0.0148315	3.19E-09	MS4A6A
rs141094656	1	92753336	C	T	0.273907	0.0429665	1.83E-10	SERPINA1
rs35979828	12	54685880	T	C	0.155142	0.0256159	1.39E-09	SERPINA1
rs56320514	14	94848305	A	G	-0.519035	0.0228444	2.81E-114	SERPINA1
rs117068684	14	94982057	T	C	-0.317212	0.0377126	4.05E-17	SERPINA1
rs6575424	14	94854852	T	C	0.582377	0.0115471	1.00E-200	SERPINA1
rs11844114	14	94460529	T	A	-0.0914592	0.0120941	3.96E-14	SERPINA1
rs4065321	17	38143548	T	C	-0.0687425	0.011927	8.23E-09	SERPINA1
rs56330463	5	148200011	C	T	-0.110458	0.0120314	4.29E-20	THBD
rs6893300	5	179135815	A	C	-0.0970034	0.0129951	8.36E-14	THBD
rs149007767	7	50370254	T	C	-0.285181	0.016508	7.21E-67	THBD
rs844813	20	23078996	T	C	0.80327	0.0185135	1.00E-200	THBD
rs149007767	7	50370254	T	C	-0.201525	0.0165951	6.20E-34	CFP
rs75230690	1	111773307	C	T	-0.132631	0.0187255	1.41E-12	C1orf162
rs34545086	1	112009749	T	C	-0.216748	0.0124901	1.85E-67	C1orf162
rs41282528	1	112151839	T	C	0.136082	0.0158235	7.97E-18	C1orf162
rs149110519	6	144385777	T	C	0.252134	0.0265731	2.35E-21	C1orf162
rs9420589	10	94450233	T	G	0.0820018	0.0120066	8.52E-12	C1orf162
rs12459300	19	18227847	A	G	-0.434856	0.0169033	5.96E-146	IFI30
rs149110519	6	144385777	T	C	0.166253	0.026621	4.23E-10	FGL2
rs66471312	7	76851105	C	T	-0.284133	0.0165999	1.12E-65	FGL2
rs149007767	7	50370254	T	C	-0.168979	0.0166209	2.79E-24	FGL2
rs4728783	7	76135677	T	C	0.0885212	0.0121791	3.64E-13	FGL2
rs78860686	7	76838343	T	C	-0.249324	0.0272292	5.36E-20	FGL2
rs12264390	10	959111	C	T	-0.112515	0.0145476	1.04E-14	FGL2
rs2998286	10	28780373	C	T	0.0975489	0.0143231	9.71E-12	FGL2
rs7210990	17	16170764	A	C	-0.0799264	0.0118922	1.80E-11	FGL2
rs11570034	11	47375889	G	A	-1.09005	0.0311909	1.00E-200	SPI1
rs72895725	11	47862640	G	A	0.203254	0.0348025	5.21E-09	SPI1
rs72895718	11	47853793	T	C	0.282926	0.0271608	2.08E-25	SPI1
rs1375493	2	182323766	A	G	0.0839189	0.0119848	2.52E-12	LGALS1
rs1991866	8	130624105	C	G	-0.0703994	0.0120541	5.21E-09	LGALS1
rs12346772	9	113920599	G	A	0.0962781	0.0146642	5.19E-11	LGALS1
rs3184504	12	111884608	C	T	0.10595	0.0119125	5.90E-19	LGALS1
rs141168043	22	38336203	T	G	0.422799	0.0261891	1.25E-58	LGALS1
rs62236671	22	38069305	A	G	-0.405828	0.0121836	1.00E-200	LGALS1
rs76943378	19	7633070	A	G	0.102636	0.0143651	9.01E-13	STXBP2
rs710951	19	7710269	G	A	0.297847	0.0120775	2.78E-134	STXBP2
rs149007767	7	50370254	T	C	-0.130046	0.0166457	5.59E-15	CEBPD
rs9420589	10	94450233	T	G	0.0974634	0.0119985	4.55E-16	CEBPD
rs10187817	2	70128317	A	G	0.129917	0.0119475	1.53E-27	MXD1
rs56330463	5	148200011	C	T	-0.0934825	0.0120416	8.28E-15	MXD1
rs149007767	7	50370254	T	C	0.0980079	0.0166612	4.04E-09	MXD1
rs73257091	5	139664664	T	C	0.247854	0.0141107	4.58E-69	HBEGF
rs4687748	3	53866330	G	A	-0.135161	0.0187466	5.60E-13	TKT
rs73840240	3	53252757	C	A	-0.567958	0.0143348	1.00E-200	TKT
rs115283372	3	52455432	T	C	-0.436714	0.0412625	3.54E-26	TKT
rs9831958	3	53449365	C	T	-0.180183	0.0123384	2.66E-48	TKT
rs13165424	5	154353012	G	A	0.0884	0.0133692	3.79E-11	TKT
rs149007767	7	50370254	T	C	0.116305	0.0166529	2.87E-12	CFD
rs10426534	19	817783	T	C	-0.197856	0.0246206	9.27E-16	CFD
rs10413889	19	850299	A	G	0.935695	0.0209403	1.00E-200	CFD
rs2965285	19	896506	G	A	1.0254	0.0191932	1.00E-200	CFD
rs10412459	19	903857	T	C	0.134172	0.0120099	5.59E-29	CFD
rs7256075	19	1030956	C	G	-0.111291	0.0171243	8.09E-11	CFD
rs56330463	5	148200011	C	T	-0.0751493	0.0120507	4.49E-10	IER3
rs2233966	6	31080859	G	A	0.169879	0.0118212	7.91E-47	IER3
rs1264372	6	30769726	T	C	0.43847	0.0134623	1.00E-200	IER3
rs1128175	6	31150435	G	A	0.117956	0.0137674	1.05E-17	IER3
rs114708313	6	31329004	T	A	-0.144876	0.0214453	1.42E-11	IER3
rs149110519	6	144385777	T	C	-0.290323	0.0265455	7.67E-28	IER3
rs77526211	13	40974023	A	G	-0.197352	0.029224	1.45E-11	IER3
rs7210990	17	16170764	A	C	0.078799	0.0118928	3.46E-11	IER3
rs56330463	5	148200011	C	T	-0.075207	0.0120507	4.35E-10	PTPRE
rs11016080	10	129928930	G	A	0.125456	0.0126139	2.63E-23	PTPRE
rs4353188	10	129878899	C	T	-0.469721	0.0121201	1.00E-200	PTPRE
rs55793580	9	127009395	T	C	-0.097313	0.0158294	7.87E-10	RAB31
rs16971217	17	33944055	G	C	0.0988348	0.0155618	2.14E-10	RAB31
rs1975771	18	9652018	C	T	0.122053	0.014755	1.32E-16	RAB31
rs479032	18	9850581	A	G	-0.466056	0.0119464	1.00E-200	RAB31
rs12456635	18	9689887	G	A	-0.22985	0.0118525	8.95E-84	RAB31
rs12605569	18	9709578	A	C	0.71454	0.0381893	4.07E-78	RAB31
rs9945088	18	9777777	T	C	0.112473	0.0118658	2.57E-21	RAB31
rs1890397	1	192770933	G	A	0.212821	0.0117927	8.36E-73	RGS2
rs56330463	5	148200011	C	T	-0.132218	0.0120158	3.67E-28	RGS2
rs7616903	3	141618833	A	G	0.143219	0.0168013	1.54E-17	ATP1B3
rs1053970	3	141645272	C	T	-0.0865223	0.0133364	8.71E-11	ATP1B3
rs597808	12	111973358	G	A	0.0866405	0.0118946	3.24E-13	EMP3
rs8102550	19	48839201	C	T	-0.388384	0.0351285	2.05E-28	EMP3
rs2594836	5	173205318	A	G	0.0863728	0.0137193	3.06E-10	RILPL2
rs951328	12	123916989	G	A	0.41746	0.0123475	1.00E-200	RILPL2
rs111787219	12	123480996	T	C	-0.252969	0.0397332	1.93E-10	RILPL2
rs34436758	12	123946841	A	G	0.622832	0.0385566	1.07E-58	RILPL2
rs143786003	12	124695007	A	C	0.208504	0.0341838	1.06E-09	RILPL2
rs149110519	6	144385777	T	C	0.166649	0.0266208	3.85E-10	CEBPB
rs7210990	17	16170764	A	C	0.09425	0.0118848	2.19E-15	CEBPB
rs913678	20	48955424	C	T	-0.190232	0.0128047	6.31E-50	CEBPB
rs1889236	20	48905967	T	C	-0.218294	0.0136612	1.78E-57	CEBPB
rs56330463	5	148200011	C	T	-0.085297	0.0120459	1.43E-12	SAMSN1
rs56388170	7	28724374	T	G	-0.0962587	0.0131023	2.03E-13	SAMSN1
rs459526	21	15964278	T	C	-0.0700897	0.0119572	4.58E-09	SAMSN1
rs1882917	21	15930957	G	T	0.158516	0.0118381	6.88E-41	SAMSN1
rs10998535	10	70805373	T	C	0.461852	0.0146197	1.00E-200	SRGN
rs10998562	10	70841333	A	G	-0.140227	0.0127065	2.56E-28	SRGN
rs35979828	12	54685880	T	C	-0.203649	0.0255918	1.75E-15	SRGN
rs7210990	17	16170764	A	C	0.0700676	0.0118966	3.87E-09	SRGN
rs148418496	6	32600607	A	C	-0.400818	0.0236432	1.83E-64	HLA-DRB5
rs57760582	6	32479550	C	T	-0.370954	0.011489	1.00E-200	HLA-DRB5
rs86715	6	33480435	G	A	-0.136051	0.0186312	2.83E-13	HLA-DRB5
rs11751673	6	32559885	G	C	-0.348334	0.022747	6.22E-53	HLA-DRB5
rs115327502	6	32453277	T	C	1.21817	0.0294053	1.00E-200	HLA-DRB5
rs3093990	6	31491826	G	A	-0.661209	0.0148577	1.00E-200	HLA-DRB5
rs192117946	6	32455544	G	A	-0.66774	0.0106365	1.00E-200	HLA-DRB5
rs62436797	6	167500059	T	C	0.516329	0.0113869	1.00E-200	RNASET2
rs58791012	6	167395529	A	G	0.6278	0.0233048	7.76E-160	RNASET2
rs62436418	6	167345772	C	T	0.507935	0.0118675	1.00E-200	RNASET2
rs185145781	6	167597000	T	C	-0.390432	0.0397743	9.59E-23	RNASET2
rs6928996	6	167744331	A	G	0.112656	0.0136944	1.93E-16	RNASET2
rs2124440	2	182328214	A	G	0.0692153	0.0119504	6.96E-09	TSPO
rs739092	22	43544823	T	C	-0.37295	0.0123519	2.88E-200	TSPO
rs79971617	22	43492592	A	C	0.376394	0.0441554	1.54E-17	TSPO
rs150299756	22	43483624	G	A	-0.247465	0.0423299	5.03E-09	TSPO
rs6915667	6	2910529	G	A	-0.238339	0.0181452	2.07E-39	SERPINB1
rs67462420	6	2765697	G	A	0.119727	0.0128401	1.12E-20	SERPINB1
rs15286	6	2833739	G	A	-0.490809	0.0126272	1.00E-200	SERPINB1
rs3859192	17	38128648	T	C	0.0746835	0.0119343	3.90E-10	SERPINB1
rs4970966	1	150584103	T	G	-0.326097	0.0143639	4.23E-114	MCL1
rs55793580	9	127009395	T	C	-0.123179	0.0158167	6.81E-15	MCL1
rs3809112	11	307036	C	T	0.147114	0.0126174	2.05E-31	IFITM2
rs61876177	11	199813	G	A	-0.13557	0.0164325	1.58E-16	IFITM2
rs6598043	11	324630	C	G	0.283231	0.0124942	9.06E-114	IFITM2
rs7150626	14	90858484	T	C	-0.346591	0.0139508	3.03E-136	CALM1
rs2074585	15	91009484	A	G	0.117218	0.0118751	5.57E-23	CALM1
rs55793580	9	127009395	T	C	-0.100497	0.015828	2.16E-10	TSC22D3
rs421706	13	42087771	C	T	0.260878	0.0117844	1.37E-108	RGCC
rs61962996	13	42120153	T	C	-0.0824056	0.0133738	7.19E-10	RGCC
rs4245312	13	41986283	T	C	-0.348427	0.0240539	1.50E-47	RGCC
rs11897084	2	136861225	G	A	0.0791658	0.0119197	3.10E-11	CXCR4
rs56388170	7	28724374	T	G	-0.0843246	0.0131081	1.25E-10	CXCR4
rs17056278	5	158252438	G	C	-0.169703	0.0243942	3.48E-12	CD79A
rs34794906	6	31237858	C	T	-0.104789	0.0128332	3.20E-16	CD79A
rs10098310	8	130613614	A	G	0.0860424	0.0120179	8.09E-13	CD79A
rs7090445	10	63721176	T	C	-0.0734228	0.0127738	9.04E-09	CD79A
rs653178	12	112007756	T	C	0.107897	0.0119072	1.29E-19	CD79A
rs12232384	16	86009760	A	C	0.0853971	0.0145831	4.75E-09	CD79A
rs12453507	17	38053207	G	C	-0.1088	0.0118697	4.91E-20	CD79A
rs6074022	20	44740196	T	C	-0.0815114	0.0136693	2.48E-09	CD79A
rs1375493	2	182323766	A	G	0.100227	0.0119759	5.80E-17	ANXA1
rs1000668	9	75405859	A	T	0.108803	0.0147661	1.73E-13	ANXA1
rs1935316	9	75732302	T	C	0.220667	0.0125226	1.68E-69	ANXA1
rs55793580	9	127009395	T	C	-0.14543	0.0158033	3.49E-20	ANXA1
rs7867580	9	75852207	G	A	0.589756	0.0126483	1.00E-200	ANXA1
rs10774624	12	111833788	A	G	0.10788	0.0119045	1.28E-19	ANXA1
rs9267485	6	31505790	A	G	-0.120649	0.0144984	8.69E-17	LTB
rs3007692	1	151931004	G	A	-0.458919	0.019536	5.07E-122	S100A10
rs1375493	2	182323766	A	G	0.118576	0.0119641	3.73E-23	S100A10
rs55793580	9	127009395	T	C	-0.131369	0.015812	9.72E-17	S100A10
rs7310615	12	111865049	G	C	0.172612	0.0118483	4.46E-48	S100A10
rs149110519	6	144385777	T	C	0.179318	0.026615	1.61E-11	CD37
rs117646304	19	49705678	A	G	-0.371089	0.0426549	3.33E-18	CD37
rs254660	19	49851053	C	T	0.128867	0.0129238	2.04E-23	CD37
rs66967196	19	49808894	A	G	-0.518592	0.0136761	1.00E-200	CD37
rs12058824	1	22963050	A	G	-0.596979	0.0203897	1.94E-188	C1QA
rs6687402	1	23031406	A	G	0.11283	0.0132966	2.15E-17	C1QA
rs7551801	1	22846452	G	C	0.124965	0.01255	2.34E-23	C1QB
rs7517504	1	22973092	C	G	0.432316	0.0220129	7.18E-86	C1QB
rs141094656	1	92753336	C	T	0.295206	0.0429565	6.32E-12	C1QB
rs9787086	1	22954360	T	C	0.55709	0.0122388	1.00E-200	C1QB
rs2734442	12	10600368	A	G	-0.117775	0.0180266	6.43E-11	C1QB
rs1892548	13	41002641	C	T	-0.0744594	0.012373	1.77E-09	C1QB
rs4968214	17	7477477	G	A	0.272601	0.0128472	6.40E-100	CD68
rs71371809	17	7594191	T	C	0.218546	0.0290014	4.86E-14	CD68
rs11657418	17	7314885	C	G	0.0835535	0.0138897	1.79E-09	CD68
rs56330463	5	148200011	C	T	-0.0707859	0.0120526	4.28E-09	BTG1
rs1032433	12	92525880	T	C	-0.188748	0.0157242	3.40E-33	BTG1
rs118019635	8	82193282	A	C	-0.309145	0.0220489	1.16E-44	FABP5
rs11130203	3	49575367	A	G	-0.158554	0.0128372	4.80E-35	GPX1
rs56330463	5	148200011	C	T	0.107568	0.0120333	3.91E-19	ZFP36
rs1050391	6	32917857	G	A	-0.340862	0.0223436	1.52E-52	HLA-DMA
rs189189739	6	32472541	G	A	-0.168862	0.0264136	1.62E-10	HLA-DQB1
rs9273165	6	32613124	T	C	-0.489161	0.0112482	1.00E-200	HLA-DQB1
rs116516516	6	32656691	T	C	0.410018	0.0343338	7.15E-33	HLA-DQB1
rs3134962	6	32107851	A	G	-0.32638	0.0171662	1.33E-80	HLA-DQB1
rs2269423	6	32145707	C	A	-0.446995	0.0117012	1.00E-200	HLA-DQB1
rs643381	6	139839423	A	C	0.0763046	0.0118862	1.37E-10	LGALS3
rs6592965	7	50427982	A	G	0.0966698	0.0119369	5.58E-16	LGALS3
rs7141706	14	55686601	G	C	-0.151577	0.02041	1.11E-13	LGALS3
rs6684514	1	156255456	A	G	0.10309	0.013125	4.02E-15	CTSD
rs149007767	7	50370254	T	C	-0.100338	0.0166602	1.71E-09	CTSD
rs187312763	11	1737957	A	G	-0.603668	0.0412985	2.18E-48	CTSD
rs72850978	11	1818173	G	C	-0.189156	0.0214479	1.15E-18	CTSD
rs907612	11	1874221	T	C	-0.117068	0.0122823	1.55E-21	CTSD
rs9271379	6	32587333	T	C	-0.471993	0.0126419	1.00E-200	HLA-DQA1
rs9268831	6	32427748	T	C	-0.451093	0.0112981	1.00E-200	HLA-DQA1
rs80074882	6	32184329	G	A	0.236901	0.0319973	1.32E-13	HLA-DQA1
rs62395849	6	31871125	C	G	0.201497	0.0327888	7.99E-10	HLA-DQA1
rs115075841	6	32736772	T	C	0.157812	0.0243398	8.96E-11	HLA-DQA1
rs35337578	6	31938451	C	T	-0.286695	0.0204035	7.55E-45	HLA-DQA1
rs6782228	3	128323424	C	G	-0.0775059	0.0133327	6.13E-09	NPC2
rs12586772	14	74932641	T	A	-0.413108	0.0115184	1.00E-200	NPC2
rs2902940	20	39091487	G	A	0.0910612	0.0133111	7.88E-12	NPC2
rs28498283	2	43360065	T	A	0.0821861	0.0136497	1.73E-09	NOP10
rs149007767	7	50370254	T	C	0.0987391	0.0166609	3.10E-09	NOP10
rs12264390	10	959111	C	T	-0.118182	0.0145444	4.45E-16	NOP10
rs60096946	15	34662098	C	T	0.29143	0.0158108	7.25E-76	NOP10
rs187857270	15	34632903	T	C	1.38653	0.0480317	3.12E-183	NOP10
rs34393830	15	34645539	T	C	-0.266601	0.0185624	8.88E-47	NOP10
rs73376156	15	34431604	T	C	0.671669	0.0165535	1.00E-200	NOP10
rs115388715	1	182213820	A	G	0.206862	0.0258944	1.36E-15	GLUL
rs10752870	1	182374330	C	G	0.308894	0.0144423	1.72E-101	GLUL
rs56330463	5	148200011	C	T	-0.105927	0.0120343	1.34E-18	GLUL
rs149007767	7	50370254	T	C	0.117678	0.0166522	1.59E-12	GLUL
rs1375493	2	182323766	A	G	0.0761151	0.0119885	2.16E-10	VIM
rs55793580	9	127009395	T	C	-0.116173	0.0158204	2.08E-13	VIM
rs2932908	10	17015144	A	G	0.147769	0.0124749	2.27E-32	VIM
rs165530	10	17281756	C	A	0.241527	0.0133396	2.85E-73	VIM
rs12261966	10	17143000	T	C	-0.0776027	0.0128936	1.76E-09	VIM
rs10774624	12	111833788	A	G	0.0882755	0.0119159	1.28E-13	VIM
rs7035393	9	113023333	T	C	0.364491	0.012351	2.08E-191	TXN
rs7020757	9	113002466	G	A	-0.07367	0.0120223	8.91E-10	TXN
rs66730925	9	113152120	A	G	-0.213705	0.0277917	1.48E-14	TXN
rs73660574	9	135860412	A	G	0.221346	0.0326865	1.27E-11	YBX1
rs7213285	17	27206029	A	G	0.117489	0.0161856	3.91E-13	YBX1
rs6084653	20	4157072	G	C	-0.0851249	0.0123321	5.10E-12	YBX1
rs2162644	12	49548190	A	G	0.121998	0.0122951	3.33E-23	TUBA1B
