# Supplementary material for: Potential marker genes for chronic obstructive pulmonary disease revealed based on single-cell sequencing and Mendelian randomization analysis
Source: Aging (Albany NY). 2024 May 23;16(10):8922–43. doi: 10.18632/aging.205849 (PMC11164476; doi:10.18632/aging.205849)
Supplement: Supplementary Table 3 [file aging-16-205849-s004.xls]

## Sheet: Sheet1
Supplementary Table 3. Results of Mendelian randomization analysis of four key marker genes associated with COPD.
CD14
	id.exposure	id.outcome	outcome	exposure	method	nsnp	b	se	pval	lo_ci	up_ci	or	or_lci95	or_uci95
	eqtl-a-ENSG00000170458	ukb-b-16751	Diagnoses - secondary ICD10: J44.9 Chronic obstructive pulmonary disease, unspecified || id:ukb-b-16751	|| id:eqtl-a-ENSG00000170458	Inverse variance weighted	6	0.000936577	0.000367368	0.0107901	0.000216535	0.00165662	1.00094	1.00022	1.00166
	eqtl-a-ENSG00000170458	ukb-b-16751	Diagnoses - secondary ICD10: J44.9 Chronic obstructive pulmonary disease, unspecified || id:ukb-b-16751	|| id:eqtl-a-ENSG00000170458	MR Egger	6	0.000588819	0.000566739	0.357498	-0.000521989	0.00169963	1.00059	0.999478	1.0017
	eqtl-a-ENSG00000170458	ukb-b-16751	Diagnoses - secondary ICD10: J44.9 Chronic obstructive pulmonary disease, unspecified || id:ukb-b-16751	|| id:eqtl-a-ENSG00000170458	Weighted median	6	0.000878368	0.00044315	0.0474682	9.79308e-06	0.00174694	1.00088	1.00001	1.00175
	eqtl-a-ENSG00000170458	ukb-b-16751	Diagnoses - secondary ICD10: J44.9 Chronic obstructive pulmonary disease, unspecified || id:ukb-b-16751	|| id:eqtl-a-ENSG00000170458	Weighted mode	6	0.000636461	0.00045914	0.22432	-0.000263454	0.00153638	1.00064	0.999737	1.00154
COTL1
	id.exposure	id.outcome	outcome	exposure	method	nsnp	b	se	pval	lo_ci	up_ci	or	or_lci95	or_uci95
	eqtl-a-ENSG00000103187	ukb-b-16751	Diagnoses - secondary ICD10: J44.9 Chronic obstructive pulmonary disease, unspecified || id:ukb-b-16751	|| id:eqtl-a-ENSG00000103187	Inverse variance weighted	3	-0.00254184	0.000911492	0.00529262	-0.00432837	-0.00075532	0.997461	0.995681	0.999245
	eqtl-a-ENSG00000103187	ukb-b-16751	Diagnoses - secondary ICD10: J44.9 Chronic obstructive pulmonary disease, unspecified || id:ukb-b-16751	|| id:eqtl-a-ENSG00000103187	MR Egger	3	-0.00268069	0.00189236	0.391324	-0.00638972	0.00102833	0.997323	0.993631	1.00103
	eqtl-a-ENSG00000103187	ukb-b-16751	Diagnoses - secondary ICD10: J44.9 Chronic obstructive pulmonary disease, unspecified || id:ukb-b-16751	|| id:eqtl-a-ENSG00000103187	Weighted median	3	-0.002561	0.000991607	0.00980371	-0.00450455	-0.000617451	0.997442	0.995506	0.999383
	eqtl-a-ENSG00000103187	ukb-b-16751	Diagnoses - secondary ICD10: J44.9 Chronic obstructive pulmonary disease, unspecified || id:ukb-b-16751	|| id:eqtl-a-ENSG00000103187	Weighted mode	3	-0.0025772	0.00114674	0.153627	-0.00482481	-0.000329588	0.997426	0.995187	0.99967
CSTA
	id.exposure	id.outcome	outcome	exposure	method	nsnp	b	se	pval	lo_ci	up_ci	or	or_lci95	or_uci95
	eqtl-a-ENSG00000121552	ukb-b-16751	Diagnoses - secondary ICD10: J44.9 Chronic obstructive pulmonary disease, unspecified || id:ukb-b-16751	|| id:eqtl-a-ENSG00000121552	Inverse variance weighted	3	0.000785195	0.000366674	0.0322422	6.65128e-05	0.00150388	1.00079	1.00007	1.00151
	eqtl-a-ENSG00000121552	ukb-b-16751	Diagnoses - secondary ICD10: J44.9 Chronic obstructive pulmonary disease, unspecified || id:ukb-b-16751	|| id:eqtl-a-ENSG00000121552	MR Egger	3	0.000940773	0.000729578	0.419932	-0.000489201	0.00237075	1.00094	0.999511	1.00237
	eqtl-a-ENSG00000121552	ukb-b-16751	Diagnoses - secondary ICD10: J44.9 Chronic obstructive pulmonary disease, unspecified || id:ukb-b-16751	|| id:eqtl-a-ENSG00000121552	Weighted median	3	0.00078972	0.00036879	0.0322432	6.68922e-05	0.00151255	1.00079	1.00007	1.00151
	eqtl-a-ENSG00000121552	ukb-b-16751	Diagnoses - secondary ICD10: J44.9 Chronic obstructive pulmonary disease, unspecified || id:ukb-b-16751	|| id:eqtl-a-ENSG00000121552	Weighted mode	3	0.000846982	0.000406703	0.172718	4.98448e-05	0.00164412	1.00085	1.00005	1.00165
GZMH
	id.exposure	id.outcome	outcome	exposure	method	nsnp	b	se	pval	lo_ci	up_ci	or	or_lci95	or_uci95
	eqtl-a-ENSG00000100450	ukb-b-16751	Diagnoses - secondary ICD10: J44.9 Chronic obstructive pulmonary disease, unspecified || id:ukb-b-16751	|| id:eqtl-a-ENSG00000100450	Inverse variance weighted	6	-0.00140787	0.000694249	0.0425698	-0.0027686	-4.71442e-05	0.998593	0.997235	0.999953
	eqtl-a-ENSG00000100450	ukb-b-16751	Diagnoses - secondary ICD10: J44.9 Chronic obstructive pulmonary disease, unspecified || id:ukb-b-16751	|| id:eqtl-a-ENSG00000100450	MR Egger	6	-0.000827469	0.00216961	0.722306	-0.0050799	0.00342496	0.999173	0.994933	1.00343
	eqtl-a-ENSG00000100450	ukb-b-16751	Diagnoses - secondary ICD10: J44.9 Chronic obstructive pulmonary disease, unspecified || id:ukb-b-16751	|| id:eqtl-a-ENSG00000100450	Weighted median	6	-0.00106124	0.000817647	0.194313	-0.00266383	0.000541344	0.998939	0.99734	1.00054
	eqtl-a-ENSG00000100450	ukb-b-16751	Diagnoses - secondary ICD10: J44.9 Chronic obstructive pulmonary disease, unspecified || id:ukb-b-16751	|| id:eqtl-a-ENSG00000100450	Weighted mode	6	-0.00103138	0.000936575	0.320968	-0.00286706	0.000804313	0.998969	0.997137	1.0008
