# Supplementary material for: Potential marker genes for chronic obstructive pulmonary disease revealed based on single-cell sequencing and Mendelian randomization analysis
Source: Aging (Albany NY). 2024 May 23;16(10):8922–43. doi: 10.18632/aging.205849 (PMC11164476; doi:10.18632/aging.205849)
Supplement: Supplementary Table 4 [file aging-16-205849-s005.xls]

Supplementary Table 4. Results of co-localization analysis of four genes at the eQI-GWAS level.
snp	pvalues.df1	MAF.df1	N.df1	V.df1	z.df1	r.df1	lABF.df1	pvalues.df2	MAF.df2	N.df2	V.df2	z.df2	r.df2	lABF.df2	internal.sum.lABF	SNP.PP.H4	Symbol
rs4982988	1.15E-58	0.47788	31864	6.29E-05	16.14920163	0.997212687	127.0935571	0.955	0.4701	213746	0.000620922	0.056429069	0.984714227	-2.088848586	125.0047085	0.558690003	GZMH
rs247867	3.05E-43	0.107327	31864	0.000163783	13.78700018	0.992773368	91.88887184	0.1808	0.1043	213746	0.001655673	1.338295893	0.960253369	-0.752690967	91.13618088	0.996087475	COTL1
rs9834975	0.00E+00	0.44149	31864	6.36E-05	37.61062901	0.997179613	702.3494641	0.8063	0.4986	213746	0.000618707	0.245202036	0.984767939	-2.062572289	700.2868918	0.020400275	CSTA
rs57599368	1.53E-302	0.240772	31864	8.58E-05	37.17830158	0.996199373	685.7000967	0.8289	0.2759	213746	0.000774232	0.216112572	0.981011733	-1.959058114	683.7410386	0.655889072	CD14
